# Supplementary material for: Zirconia Crowns for Primary Teeth: A Systematic Review and Meta-Analyses
Source: MDPI journal article supplement (doi:10.3390/ijerph19052838), 2022-02-28
Supplement: s1 [file s1]

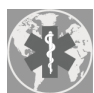

**Supplemental Table S1.** Summary of the included studies' findings about zirconia crowns for primary teeth and gingival and periodontal health.

| Study                   | Assessment Method                                                                                                                              | Time of Evaluation | Results    |            |      |             |      |             |         | Summary of Results                                                                                                                                                                                                                                                                                                                                                                                                                                                                                                                                                                      |  |
|-------------------------|------------------------------------------------------------------------------------------------------------------------------------------------|--------------------|------------|------------|------|-------------|------|-------------|---------|-----------------------------------------------------------------------------------------------------------------------------------------------------------------------------------------------------------------------------------------------------------------------------------------------------------------------------------------------------------------------------------------------------------------------------------------------------------------------------------------------------------------------------------------------------------------------------------------|--|
| Tara et al., 2018 [30]  | <b>PI:</b><br>0= None<br>1= Film at margins<br>2= Moderate<br>3= Abundance<br><br><b>GI:</b><br>0= None<br>1= Mild<br>2= Moderate<br>3= Severe | At 1, 3, 6, 12 m   | Median GI  |            |      |             |      |             |         | There were significantly different GI scores among the C-ZC, SSC, and C-SSC groups at all evaluation time-points (C-ZC P=0.0003, SSC P=0.034, C-SSC P=0.004) respectively, no significant difference was found in ZC group (P=0.076). There was significant difference between the ZC and their controls in PI and GI scores at all evaluations times after baseline (P<0.05). Whereas in SSCs, there were no significant difference in PI scores at all evaluation times after baseline. However, the GI scores were all significantly different except at 1-month follow up (P<0.05). |  |
|                         |                                                                                                                                                |                    | Crown Type | Baseline   | 1 m  | 3 m         | 6 m  | 12 m        | p-value |                                                                                                                                                                                                                                                                                                                                                                                                                                                                                                                                                                                         |  |
|                         |                                                                                                                                                |                    | ZC         | 0.25       | 0.25 | 0.25        | 0.25 | 0.25        | 0.076   |                                                                                                                                                                                                                                                                                                                                                                                                                                                                                                                                                                                         |  |
|                         |                                                                                                                                                |                    | C-ZC       | 0.5        | 1    | 0.25        | 0.75 | 0.5         | 0.0003  |                                                                                                                                                                                                                                                                                                                                                                                                                                                                                                                                                                                         |  |
|                         |                                                                                                                                                |                    | SSC        | 0.5        | 1    | 0.75        | 1    | 1           | 0.034   |                                                                                                                                                                                                                                                                                                                                                                                                                                                                                                                                                                                         |  |
|                         |                                                                                                                                                |                    | C-SSC      | 0          | 0.25 | 0.25        | 0.5  | 0.5         | 0.004   |                                                                                                                                                                                                                                                                                                                                                                                                                                                                                                                                                                                         |  |
|                         |                                                                                                                                                |                    | Median PI  |            |      |             |      |             |         |                                                                                                                                                                                                                                                                                                                                                                                                                                                                                                                                                                                         |  |
|                         |                                                                                                                                                |                    | Crown Type | Baseline   | 1 m  | 3 m         | 6 m  | 12 m        | p-value |                                                                                                                                                                                                                                                                                                                                                                                                                                                                                                                                                                                         |  |
|                         |                                                                                                                                                |                    | ZC         | 0.25       | 0    | 0           | 0    | 0           | 0.18    |                                                                                                                                                                                                                                                                                                                                                                                                                                                                                                                                                                                         |  |
|                         |                                                                                                                                                |                    | C-ZC       | 0.5        | 0.75 | 0.5         | 0.75 | 0.75        | 0.124   |                                                                                                                                                                                                                                                                                                                                                                                                                                                                                                                                                                                         |  |
|                         |                                                                                                                                                |                    | SSC        | 0.5        | 0.5  | 1           | 1    | 1           | 0.257   |                                                                                                                                                                                                                                                                                                                                                                                                                                                                                                                                                                                         |  |
|                         |                                                                                                                                                |                    | C-SSC      | 0.25       | 0.75 | 0.5         | 0.5  | 0.5         | 0.55    |                                                                                                                                                                                                                                                                                                                                                                                                                                                                                                                                                                                         |  |
| Walia et al., 2014 [27] | <b>GI:</b><br>0= None<br>1= Mild<br>2= Moderate<br>3= Severe                                                                                   | At 6 m             | Mean GI    |            |      |             |      |             |         | The Results showed that at the 6-month follow up, the mean GI was increased in group RCSC and PVSSC, while it was significantly reduced (p=0.01) in ZZC. When comparing the differences mean GI between all groups, there was statistically significant differences between RCSC and ZZC and PVSSC and ZZC (p=0.00) only.                                                                                                                                                                                                                                                               |  |
|                         |                                                                                                                                                |                    |            |            |      | Baseline    | 6 m  |             |         |                                                                                                                                                                                                                                                                                                                                                                                                                                                                                                                                                                                         |  |
|                         |                                                                                                                                                |                    | Crown Type | n-Baseline | n-6m | Mean (SD)   |      | Mean (SD)   |         |                                                                                                                                                                                                                                                                                                                                                                                                                                                                                                                                                                                         |  |
|                         |                                                                                                                                                |                    | RCSC       | 43         | 36   | 1.65 (0.50) |      | 1.97 (0.44) |         |                                                                                                                                                                                                                                                                                                                                                                                                                                                                                                                                                                                         |  |
|                         |                                                                                                                                                |                    | PVSSC      | 43         | 37   | 1.71 (0.50) |      | 1.95 (0.61) |         |                                                                                                                                                                                                                                                                                                                                                                                                                                                                                                                                                                                         |  |
|                         |                                                                                                                                                |                    | ZZC        | 43         | 38   | 1.67 (0.56) |      | 1.35 (0.60) |         |                                                                                                                                                                                                                                                                                                                                                                                                                                                                                                                                                                                         |  |

|                                               |                                                                                                                                                                                                          |                                           |                                              |            |            |            |             |                                                                                                                                                                                               |            |
|-----------------------------------------------|----------------------------------------------------------------------------------------------------------------------------------------------------------------------------------------------------------|-------------------------------------------|----------------------------------------------|------------|------------|------------|-------------|-----------------------------------------------------------------------------------------------------------------------------------------------------------------------------------------------|------------|
|                                               |                                                                                                                                                                                                          |                                           |                                              |            |            |            |             |                                                                                                                                                                                               |            |
| Holsing<br>er et al.,<br>2016 <sup>[44]</sup> | <b>GI:</b><br>0= None<br>1= Mild<br>2= Moderate<br>3= Marked                                                                                                                                             | (Retrospec-<br>tive study)<br>2010 – 2014 | Total number of teeth in each group (N) = 44 |            |            |            |             | The results showed that (36%) of EZP showed a mild to moderate gingival inflammation.                                                                                                         |            |
|                                               |                                                                                                                                                                                                          |                                           | <b>Score</b>                                 | <b>0</b>   | <b>1</b>   | <b>2</b>   | <b>3</b>    |                                                                                                                                                                                               |            |
|                                               |                                                                                                                                                                                                          |                                           | <b>n (%)</b>                                 | 28 (64)    | 14 (32)    | 2 (4)      | 0 (0)       |                                                                                                                                                                                               |            |
| Mathew<br>et al.,<br>2020 <sup>[48]</sup>     | <b>GI:</b><br>0= None<br>1= Mild<br>2= Moderate<br>3= Severe<br><b>PI:</b><br>0= None<br>1= Film at margins<br>2= Moderate<br>3= Large amount                                                            | At 3, 6, 9, and<br>12 m                   | Total number of teeth in each group (N) = 30 |            |            |            |             | The results showed that KKZ reported a significantly lower GI and PI scores at all time-points compared to SSC (P<0.05).                                                                      |            |
|                                               |                                                                                                                                                                                                          |                                           | <b>Mean (SD)</b>                             |            |            |            |             |                                                                                                                                                                                               |            |
|                                               |                                                                                                                                                                                                          |                                           | <b>Crown Type</b>                            | <b>3 m</b> | <b>6 m</b> | <b>9 m</b> | <b>12 m</b> |                                                                                                                                                                                               |            |
|                                               |                                                                                                                                                                                                          |                                           | <b>PI KKZ</b>                                | 0.80 (0.1) | 0.95 (0.1) | 0.99 (0.1) | 1.01 (0.1)  |                                                                                                                                                                                               |            |
|                                               |                                                                                                                                                                                                          |                                           | <b>GI KKZ</b>                                | 0.80 (0.1) | 1.12 (0.2) | 1.47 (0.1) | 1.76 (0.1)  |                                                                                                                                                                                               |            |
|                                               |                                                                                                                                                                                                          |                                           | <b>PI SSC</b>                                | 1.48 (0.2) | 1.75 (0.1) | 1.92 (0.1) | 2.41 (0.1)  |                                                                                                                                                                                               |            |
| <b>GI SSC</b>                                 | 1.38 (0.1)                                                                                                                                                                                               | 1.63 (0.2)                                | 1.89 (0.1)                                   | 2.11 (0.3) |            |            |             |                                                                                                                                                                                               |            |
| Mathew<br>et al.,<br>2020 <sup>[49]</sup>     | <b>GI:</b><br>0= Healthy<br>1= Mild, involving some pa-<br>pilla<br>2= Moderate, involving entire<br>papilla<br>3= Severe<br><b>PI</b><br>0= None<br>1= Film at margin<br>2= Moderate<br>3= Large amount | At 6, 12, 18,<br>24, and 36 m             | Total number of teeth in each group (N) = 30 |            |            |            |             | The results showed KKZ, and SSC showed no signs of inflammation both scored (100%) in GI. Whereas in PI, KKZ (100%) showed no signs of plaque accu-<br>mulation as compared to SSC (P=0.047). |            |
|                                               |                                                                                                                                                                                                          |                                           | <b>Crown Type</b>                            | <b>6m</b>  | <b>12m</b> | <b>18m</b> | <b>24m</b>  |                                                                                                                                                                                               | <b>36m</b> |
|                                               |                                                                                                                                                                                                          |                                           | <b>GI ZC (%)</b>                             | 100        | 100        | 100        | 100         |                                                                                                                                                                                               | 100        |
|                                               |                                                                                                                                                                                                          |                                           | <b>PI ZC (%)</b>                             | 100        | 100        | 100        | 100         |                                                                                                                                                                                               | 100        |
|                                               |                                                                                                                                                                                                          |                                           | <b>GI SSC (%)</b>                            | 100        | 100        | 100        | 100         |                                                                                                                                                                                               | 100        |
|                                               |                                                                                                                                                                                                          |                                           | <b>PI SSC (%)</b>                            | 100        | 80         | 80         | 87          |                                                                                                                                                                                               | 100        |

|                                     |      |                                          |                                              |          |      |      |      |      |      |      |                                                                                                                                          |      |                                                                                                                                                                                                                                                                                                                                                 |   |
|-------------------------------------|------|------------------------------------------|----------------------------------------------|----------|------|------|------|------|------|------|------------------------------------------------------------------------------------------------------------------------------------------|------|-------------------------------------------------------------------------------------------------------------------------------------------------------------------------------------------------------------------------------------------------------------------------------------------------------------------------------------------------|---|
|                                     |      |                                          |                                              |          |      |      |      |      |      |      |                                                                                                                                          |      |                                                                                                                                                                                                                                                                                                                                                 |   |
| Azab et al., <sup>[54]</sup>        | GI   | 1 week, 1, 3, 6, 9, 12, 18, 24, and 36 m | Total number of teeth in each group (N) = 25 |          |      |      |      |      |      |      | The results showed that there were no statistically significant differences between GI scores for both cements at different time-points. |      |                                                                                                                                                                                                                                                                                                                                                 |   |
|                                     |      |                                          | (Median) GI                                  |          |      |      |      |      |      |      |                                                                                                                                          |      |                                                                                                                                                                                                                                                                                                                                                 |   |
|                                     |      |                                          | Cement type                                  | Baseline | 1 w  |      | 1 m  |      | 3 m  |      |                                                                                                                                          | 6 m  |                                                                                                                                                                                                                                                                                                                                                 |   |
|                                     |      |                                          | Bio-active cement                            | 0.25     | 1.13 |      | 1.00 |      | 0.50 |      |                                                                                                                                          | 0.38 |                                                                                                                                                                                                                                                                                                                                                 |   |
|                                     |      |                                          | Packable GIC                                 | 0.25     | 1.00 |      | 0.50 |      | 0.25 |      |                                                                                                                                          | 0.38 |                                                                                                                                                                                                                                                                                                                                                 |   |
|                                     |      |                                          |                                              | 9 m      | 12 m |      | 18 m |      | 24 m |      |                                                                                                                                          | 36 m |                                                                                                                                                                                                                                                                                                                                                 |   |
|                                     |      |                                          | Bio-active cement                            | 0.50     | 0.25 |      | 0.25 |      | 0.50 |      |                                                                                                                                          | 0.25 |                                                                                                                                                                                                                                                                                                                                                 |   |
| Packable GIC                        | 0.50 | 0.50                                     |                                              | 0.38     |      | 0.50 |      | 0.50 |      |      |                                                                                                                                          |      |                                                                                                                                                                                                                                                                                                                                                 |   |
| Donly et al., 2018 <sup>[55]</sup>  | GI   | At 6,12 and 24 m                         | Total number of teeth in each group (N)      | 6 m      |      |      | 12 m |      |      | 24 m |                                                                                                                                          |      | The results showed that the gingival health appear to be better in NSZ as compared to SSC at 6-month follow up. However, Gingival health appear to be similar in both crowns at 2-year follow up. No crown score C at all evaluation time-points. There were no statistically significant differences (P<0.05) in the GI score for both crowns. |   |
|                                     |      |                                          |                                              | N=44     |      |      | N=43 |      |      | N=39 |                                                                                                                                          |      |                                                                                                                                                                                                                                                                                                                                                 |   |
|                                     |      |                                          |                                              | Score    | 0    | 1    | 2    | 0    | 1    | 2    | 0                                                                                                                                        | 1    |                                                                                                                                                                                                                                                                                                                                                 | 2 |
|                                     |      |                                          |                                              | NSZ n    | 34   | 9    | 0    | 33   | 10   | 0    | 28                                                                                                                                       | 8    |                                                                                                                                                                                                                                                                                                                                                 | 0 |
|                                     |      |                                          |                                              | SSC n    | 28   | 15   | 0    | 28   | 14   | 0    | 26                                                                                                                                       | 8    |                                                                                                                                                                                                                                                                                                                                                 | 0 |
| Hanafi et al., 2021 <sup>[56]</sup> | GI:  | At 1, 3 and 6 m                          | Total number of (CAD/CAM) ZC (N) = 15        |          |      |      |      |      |      |      |                                                                                                                                          |      | The results showed that CCZC had no changes in gingival appearance, bleeding or gingival recession, and there was improvement in oral health of                                                                                                                                                                                                 |   |
|                                     |      |                                          | Total number of NSZ (N) = 16                 |          |      |      |      |      |      |      |                                                                                                                                          |      |                                                                                                                                                                                                                                                                                                                                                 |   |
|                                     |      |                                          | GI                                           |          |      |      |      |      |      |      |                                                                                                                                          |      |                                                                                                                                                                                                                                                                                                                                                 |   |
|                                     |      |                                          |                                              |          |      | 1m   |      |      | 3m   |      |                                                                                                                                          | 6m   |                                                                                                                                                                                                                                                                                                                                                 |   |
| Score                               |      |                                          | 0                                            | 1        | 2    | 0    | 1    | 2    | 0    | 1    | 2                                                                                                                                        |      |                                                                                                                                                                                                                                                                                                                                                 |   |

|                                                                                                                                                                                                                                                                             |                                       |       |    |       |   |       |   |       |    |    |                                                                                                                                                 |
|-----------------------------------------------------------------------------------------------------------------------------------------------------------------------------------------------------------------------------------------------------------------------------|---------------------------------------|-------|----|-------|---|-------|---|-------|----|----|-------------------------------------------------------------------------------------------------------------------------------------------------|
| <div>3= Severe inflammation: a tendency toward spontaneous bleeding.</div> <div>PI</div> <div>0= None</div> <div>1= Film at margin</div> <div>2= Moderate</div> <div>3= Abundance amount</div> <div>BOP (four sites)</div> <div>0= No bleeding</div> <div>1= Bleeding</div> | <div>(CAD/CAM) ZC (n)</div>           | 0     | 12 | 3     | 0 | 14    | 1 | 0     | 15 | 0  | <div>anterior crowns. However, there was no statistically significant difference between the two types of crowns at all follow-up phases.</div> |
|                                                                                                                                                                                                                                                                             | NSZ (n)                               | 0     | 16 | 0     | 0 | 15    | 0 | 0     | 15 | 0  |                                                                                                                                                 |
|                                                                                                                                                                                                                                                                             | Total number of (CAD/CAM) ZC (N) = 15 |       |    |       |   |       |   |       |    |    |                                                                                                                                                 |
|                                                                                                                                                                                                                                                                             | Total number of NSZ (N) = 16          |       |    |       |   |       |   |       |    |    |                                                                                                                                                 |
|                                                                                                                                                                                                                                                                             | PI                                    |       |    |       |   |       |   |       |    |    |                                                                                                                                                 |
|                                                                                                                                                                                                                                                                             | Score                                 | 0     | 1  | 2     | 3 | 0     | 1 | 2     | 3  | 0  |                                                                                                                                                 |
|                                                                                                                                                                                                                                                                             | (CAD/CAM) ZC (n)                      | 13    | 0  | 2     | 0 | 15    | 0 | 0     | 0  | 15 |                                                                                                                                                 |
|                                                                                                                                                                                                                                                                             | NSZ (n)                               | 0     | 1  | 15    | 0 | 15    | 0 | 0     | 0  | 15 |                                                                                                                                                 |
|                                                                                                                                                                                                                                                                             | Total number of (CAD/CAM) ZC (N) = 15 |       |    |       |   |       |   |       |    |    |                                                                                                                                                 |
|                                                                                                                                                                                                                                                                             | Total number of NSZ (N) = 16          |       |    |       |   |       |   |       |    |    |                                                                                                                                                 |
| BOP                                                                                                                                                                                                                                                                         |                                       |       |    |       |   |       |   |       |    |    |                                                                                                                                                 |
| Score                                                                                                                                                                                                                                                                       | 0                                     | 1     | 0  | 1     | 0 | 1     | 0 | 1     | 0  |    |                                                                                                                                                 |
| (CAD/CAM) ZC (n)                                                                                                                                                                                                                                                            | 0                                     | 48/60 | 0  | 37/60 | 0 | 40/60 | 0 | 48/60 | 0  |    |                                                                                                                                                 |
| NSZ (n)                                                                                                                                                                                                                                                                     | 0                                     | 49/64 | 0  | 37/60 | 0 | 41/60 | 0 | 49/64 | 0  |    |                                                                                                                                                 |

|                                                                                                                                                                                                                                                                                        |                             |                                              |           |           |         |                                                                                                                                                                                                                                                                                                                                                                                                                     |
|----------------------------------------------------------------------------------------------------------------------------------------------------------------------------------------------------------------------------------------------------------------------------------------|-----------------------------|----------------------------------------------|-----------|-----------|---------|---------------------------------------------------------------------------------------------------------------------------------------------------------------------------------------------------------------------------------------------------------------------------------------------------------------------------------------------------------------------------------------------------------------------|
| <div>Alaki et al., 2020<sup>[58]</sup></div> <div>GI</div> <div>0= No gingival bleeding</div> <div>1= Bleeding with probe</div> <div>2= Spontaneous bleeding</div> <div>PI</div> <div>0= None</div> <div>1= Film at margin</div> <div>2= Moderate</div> <div>3= Abundance amount</div> | <div>At 3, 6 and 12 m</div> | Total number teeth in each group (N) = 60    |           |           |         | <div>The results showed that the bleeding on probing was greater in RCSC compared to ZC after following up of 3 and 6 months with p-value of (p&lt;0.006) and (p&lt;0.001) respectively. In regards of PI, during 3 and 6 months of follow up the results showed that the teeth covered with ZC had less plaque accumulation compared to teeth covered with RCSC with p-value of (p&lt;0.001) in both groups.</div> |
|                                                                                                                                                                                                                                                                                        |                             | GI (assessed as BOP)                         |           |           |         |                                                                                                                                                                                                                                                                                                                                                                                                                     |
|                                                                                                                                                                                                                                                                                        |                             | Crown type                                   | 3m        | 6m        | 12m     |                                                                                                                                                                                                                                                                                                                                                                                                                     |
|                                                                                                                                                                                                                                                                                        |                             | ZC n (%)                                     | 24 (40)   | 0 (100)   | 0 (100) |                                                                                                                                                                                                                                                                                                                                                                                                                     |
|                                                                                                                                                                                                                                                                                        |                             | RCSC n (%)                                   | 40 (66.7) | 28 (46.7) | 0 (100) |                                                                                                                                                                                                                                                                                                                                                                                                                     |
|                                                                                                                                                                                                                                                                                        |                             | Total number of teeth in each group (N) = 60 |           |           |         |                                                                                                                                                                                                                                                                                                                                                                                                                     |
| PI                                                                                                                                                                                                                                                                                     |                             |                                              |           |           |         |                                                                                                                                                                                                                                                                                                                                                                                                                     |

Alaki et al., 2020 [58]

**GI**

0= No gingival bleeding

1= Bleeding with probe

2= Spontaneous bleeding

**PI**

0= None

1= Film at margin

2= Moderate

3= Abundance amount

At 3, 6 and 12 m

The results showed that the bleeding on probing was greater in RCSC compared to ZC after following up of 3 and 6 months with p-value of (p<0.006) and (p<0.001) respectively. In regards of PI, during 3 and 6 months of follow up the results showed that the teeth covered with ZC had less plaque accumulation compared to teeth covered with RCSC with p-value of (p<0.001) in both groups.

|                          |                                                                                                                                                                                                                                                                             |         |                                                                           |                   |          |          |          |          |          |                      |          |          |          |         |   |                                                                                                                                                                                                                                                                                                      |  |
|--------------------------|-----------------------------------------------------------------------------------------------------------------------------------------------------------------------------------------------------------------------------------------------------------------------------|---------|---------------------------------------------------------------------------|-------------------|----------|----------|----------|----------|----------|----------------------|----------|----------|----------|---------|---|------------------------------------------------------------------------------------------------------------------------------------------------------------------------------------------------------------------------------------------------------------------------------------------------------|--|
|                          |                                                                                                                                                                                                                                                                             |         |                                                                           | <b>Score</b>      | <b>0</b> | <b>1</b> | <b>2</b> | <b>3</b> | <b>0</b> | <b>1</b>             | <b>2</b> | <b>3</b> |          |         |   |                                                                                                                                                                                                                                                                                                      |  |
|                          |                                                                                                                                                                                                                                                                             |         |                                                                           | <b>ZC n (%)</b>   | 20 (33)  | 36 (60)  | 4 (7)    | 0        | 47 (80)  | 12 (20)              | 0        | 0        | 58 (100) | 0       | 0 | 0                                                                                                                                                                                                                                                                                                    |  |
|                          |                                                                                                                                                                                                                                                                             |         |                                                                           | <b>RCSC n (%)</b> | 4 (7)    | 44 (73)  | 12 (20)  | 0        | 24 (40)  | 36 (60)              | 0        | 0        | 48 (80)  | 12 (20) | 0 | 0                                                                                                                                                                                                                                                                                                    |  |
| Gill et al., 2020 [38]   | 0= Healthy<br>1= Red and/or inflamed; no BOP<br>2= Spontaneous and excessive BOP                                                                                                                                                                                            | At 12 m | Total teeth number (N) =135                                               |                   |          |          |          |          |          |                      |          |          |          |         |   | The results showed that NSZ had the highest rate (83%) of healthy gingival tissues when compared to RCSC and PVSSC.                                                                                                                                                                                  |  |
|                          |                                                                                                                                                                                                                                                                             |         | <b>Score</b>                                                              | <b>0</b>          |          | <b>1</b> |          | <b>2</b> |          | <b>Missing n (%)</b> |          |          |          |         |   |                                                                                                                                                                                                                                                                                                      |  |
|                          |                                                                                                                                                                                                                                                                             |         | <b>RCSC n (%)</b>                                                         | 27 (56)           |          | 17 (35)  |          | 1 (2)    |          | 3 (6)                |          |          |          |         |   |                                                                                                                                                                                                                                                                                                      |  |
|                          |                                                                                                                                                                                                                                                                             |         | <b>PVSSC n (%)</b>                                                        | 36 (77)           |          | 11 (23)  |          | 0 (0)    |          | 0 (0)                |          |          |          |         |   |                                                                                                                                                                                                                                                                                                      |  |
|                          |                                                                                                                                                                                                                                                                             |         | <b>NSZ n (%)</b>                                                          | 33 (83)           |          | 6 (15)   |          | 0 (0)    |          | 1 (3)                |          |          |          |         |   |                                                                                                                                                                                                                                                                                                      |  |
|                          |                                                                                                                                                                                                                                                                             |         | <b>Total n (%)</b>                                                        | 96 (71)           |          | 34 (25)  |          | 1 (1)    |          | 4 (3)                |          |          |          |         |   |                                                                                                                                                                                                                                                                                                      |  |
| Sharma et al., 2021 [62] | <b>GI</b><br>0= No obvious signs of inflammation<br>1= Mild marginal gingivitis<br>2= Moderate marginal gingivitis<br>3= Severe gingivitis, tissue is very swollen: spontaneous bleeding<br><b>PI</b><br>0= None<br>1= Film at margin<br>2= Moderate<br>3= Abundance amount | At 12 m | Total number of RCSC (N) = 17<br>Total number of ZC (N) = 19<br><b>GI</b> |                   |          |          |          |          |          |                      |          |          |          |         |   | The Results showed that ZCs group had less plaque accumulation and more gingival health than RCSC group. There was a significant increase of plaque accumulation and less gingival health at 12-month follow up in RCSC when compared to ZCs with significant level of (0.013) (0.012) respectively. |  |
|                          |                                                                                                                                                                                                                                                                             |         | <b>Score</b>                                                              | <b>0</b>          |          | <b>1</b> |          | <b>2</b> |          | <b>Missing n (%)</b> |          |          |          |         |   |                                                                                                                                                                                                                                                                                                      |  |
|                          |                                                                                                                                                                                                                                                                             |         | <b>RCSC n (%)</b>                                                         | 27 (56)           |          | 17 (35)  |          | 1 (2)    |          | 1 (2)                |          |          |          |         |   |                                                                                                                                                                                                                                                                                                      |  |
|                          |                                                                                                                                                                                                                                                                             |         | <b>NSZ n (%)</b>                                                          | 33 (83)           |          | 6 (15)   |          | 0 (0)    |          | 0 (0)                |          |          |          |         |   |                                                                                                                                                                                                                                                                                                      |  |
|                          |                                                                                                                                                                                                                                                                             |         | Total number of RCSC (N) = 17<br>Total number of ZC (N) = 19<br><b>PI</b> |                   |          |          |          |          |          |                      |          |          |          |         |   |                                                                                                                                                                                                                                                                                                      |  |
|                          |                                                                                                                                                                                                                                                                             |         | <b>Score</b>                                                              | <b>0</b>          |          | <b>1</b> |          | <b>2</b> |          | <b>Missing n (%)</b> |          |          |          |         |   |                                                                                                                                                                                                                                                                                                      |  |
|                          |                                                                                                                                                                                                                                                                             |         | <b>RCSC n (%)</b>                                                         | 1 (6)             |          | 9 (53)   |          | 7 (41)   |          |                      |          |          |          |         |   |                                                                                                                                                                                                                                                                                                      |  |
|                          |                                                                                                                                                                                                                                                                             |         | <b>NSZ n (%)</b>                                                          | 2 (11)            |          | 17 (89)  |          | 0        |          |                      |          |          |          |         |   |                                                                                                                                                                                                                                                                                                      |  |

|                                      |                                                                                                                                                                             |                                          |                             |                                                                      |         |                                                                      |         |                                                                                                                                                                                                                                                                                                                                                                       |         |        |
|--------------------------------------|-----------------------------------------------------------------------------------------------------------------------------------------------------------------------------|------------------------------------------|-----------------------------|----------------------------------------------------------------------|---------|----------------------------------------------------------------------|---------|-----------------------------------------------------------------------------------------------------------------------------------------------------------------------------------------------------------------------------------------------------------------------------------------------------------------------------------------------------------------------|---------|--------|
| Yanover et al., 2020 <sup>[63]</sup> | 0= No obvious signs of inflammation<br>1= Mild marginal gingivitis<br>2= Moderate marginal gingivitis<br>3= Severe gingivitis, tissue is very swollen: spontaneous bleeding | At 6-10.4m,<br>12.5-17.9m,<br>18.4-33.8m | Total Number of ZC (N) =131 |                                                                      |         |                                                                      |         | The results showed that (58%) in 76 teeth with mild gingivitis followed by (35%) in 46 teeth with normal healthy gingiva and 7% in 9 teeth with moderate marginal gingivitis. However, the results obtained that gingival health around all tested ZC was very similar at all intervals of follow up.                                                                 |         |        |
|                                      |                                                                                                                                                                             |                                          | Score                       | 0                                                                    | 1       | 2                                                                    | 3       |                                                                                                                                                                                                                                                                                                                                                                       |         |        |
|                                      |                                                                                                                                                                             |                                          | n (%)                       | 46 (35)                                                              | 76 (58) | 9 (7)                                                                | 0 (0)   |                                                                                                                                                                                                                                                                                                                                                                       |         |        |
| Talekar et al. 2021 <sup>[64]</sup>  | GI:<br>0= Normal gingiva<br>1= Mild inflammation with slight edema<br>2= inflammation with edema and BOP                                                                    | At 12 and 18 m                           | GI                          |                                                                      |         |                                                                      |         | The results showed no significant difference between the GFRC and NZS crowns before 12 months period, however, significant differences were found between the tested periods 12 (P>0.05) and 18 months (P<0.001), respectively. The control group experienced severely poor gingival health, while none of the intervention groups experienced this for both periods. |         |        |
|                                      |                                                                                                                                                                             |                                          |                             | 12 m<br>Total number of GFRC = 30 (%)<br>Total number of NSZ= 31 (%) |         | 18 m<br>Total number of GFRC = 28 (%)<br>Total number of NSZ= 30 (%) |         |                                                                                                                                                                                                                                                                                                                                                                       |         |        |
|                                      |                                                                                                                                                                             |                                          | Score                       | 0                                                                    | 1       | 2                                                                    | 0       |                                                                                                                                                                                                                                                                                                                                                                       | 1       | 2      |
|                                      |                                                                                                                                                                             |                                          | GFRC n(%)                   | 24 (80)                                                              | 5 (17)  | 1 (3)                                                                | 20 (71) |                                                                                                                                                                                                                                                                                                                                                                       | 6 (22)  | 2 (7)  |
|                                      |                                                                                                                                                                             |                                          | NSZ n (%)                   | 29 (93)                                                              | 2 (7)   | 0 (0)                                                                | 28 (93) |                                                                                                                                                                                                                                                                                                                                                                       | 2 (7)   | 0 (0)  |
|                                      | PI<br>0= no plaque retention<br>1= mild or minimal plaque retention<br>2= Severe plaque retention                                                                           |                                          | PI                          |                                                                      |         |                                                                      |         | The results showed that at all periods, GFRC crowns scored significant plaque retention (P<0.001). Furthermore, only 6% of the tested NSZ crowns were having plaque retention at minor levels after 18 months.                                                                                                                                                        |         |        |
|                                      |                                                                                                                                                                             |                                          |                             | 12 m<br>Total number of GFRC = 30 (%)<br>Total number of NSZ= 31 (%) |         | 18 m<br>Total number of GFRC = 28 (%)<br>Total number of NSZ= 30 (%) |         |                                                                                                                                                                                                                                                                                                                                                                       |         |        |
|                                      |                                                                                                                                                                             |                                          | Score                       | 0                                                                    | 1       | 2                                                                    | 0       |                                                                                                                                                                                                                                                                                                                                                                       | 1       | 2      |
|                                      |                                                                                                                                                                             |                                          | GFRC n (%)                  | 10 (33)                                                              | 12 (40) | 8 (27)                                                               | 8 (29)  |                                                                                                                                                                                                                                                                                                                                                                       | 11 (39) | 9 (32) |
|                                      |                                                                                                                                                                             |                                          | NSZ n (%)                   | 30 (97)                                                              | 1 (3)   | 0 (0)                                                                | 28 (94) |                                                                                                                                                                                                                                                                                                                                                                       | 2 (6)   | 0 (0)  |

PI, Plaque index; GI, Gingival index; ZC, Zirconia crown; C-ZC, Controls for zirconia crowns; SSC, Stainless steel crown; C-SSC, Controls for stainless steel crown; RCSC, Resin composite strip crown; PVSSC, Preveneerd stainless steel crown; ZZC, Zirkiz zirconia crown; EZP, EZ Pedro crown; KKZ, Kinder Krown Zirconia; GIC, Glass ionomer cement; CAD/CAM ZC, Computer-aided manufacturing/Computer-aided modeling zirconia crown; NSZ, NuSmile Zirconia crown; BOP, Bleeding on probing.

**Supplemental Table S2.** Summary of the included studies' findings about parental satisfaction with zirconia crowns for primary teeth.

| Study                                                  | Assessed Outcome                                                                           | Assessment Method                                            | Results                 |        |         |                          |         |         |      | Summary of Results                                                                                                                                                                                                                                                                                                                                                                                                                                                   |
|--------------------------------------------------------|--------------------------------------------------------------------------------------------|--------------------------------------------------------------|-------------------------|--------|---------|--------------------------|---------|---------|------|----------------------------------------------------------------------------------------------------------------------------------------------------------------------------------------------------------------------------------------------------------------------------------------------------------------------------------------------------------------------------------------------------------------------------------------------------------------------|
| Holsinger et al., 2016 <sup>[44]</sup>                 | 1) Parental satisfaction ratings of esthetic characteristics of EZIP primary anterior ZCs. | Mean Likert scale rating from 1 (not at all) - 5 (very much) | Characteristics of EZIP |        |         | Total number of EZIP =54 |         |         |      | The results showed that the mean over-all satisfaction is 4.6 on a five-point scale. No parents were dissatisfied with the durability, shape, or size of the crowns; one parent reported being dissatisfied with the color of the crowns. Parent's feedback indicated that EZIP improved the oral health (83%) and appearance (78%) of their children. Moreover, majority of the parents (83%) indicated that their children did not avoid smiling before treatment. |
|                                                        |                                                                                            |                                                              | Score                   | 1      | 2       | 3                        | 4       | 5       | Mean |                                                                                                                                                                                                                                                                                                                                                                                                                                                                      |
|                                                        |                                                                                            |                                                              | Size: n (%)             | 0 (0)  | 0 (0)   | 1 (6)                    | 7 (39)  | 10 (55) | 4.5  |                                                                                                                                                                                                                                                                                                                                                                                                                                                                      |
|                                                        |                                                                                            |                                                              | Shape: n (%)            | 0 (0)  | 0 (0)   | 3 (17)                   | 4 (22)  | 11 (61) | 4.4  |                                                                                                                                                                                                                                                                                                                                                                                                                                                                      |
|                                                        | Color: n (%)                                                                               |                                                              | 0 (0)                   | 0 (0)  | 1 (6)   | 5 (28)                   | 12 (67) | 4.6     |      |                                                                                                                                                                                                                                                                                                                                                                                                                                                                      |
|                                                        | Parental ratings of the impact of treatment on their children with EZIP                    |                                                              |                         |        |         |                          |         |         |      |                                                                                                                                                                                                                                                                                                                                                                                                                                                                      |
|                                                        | Score                                                                                      |                                                              | 1                       | 2      | 3       | 4                        | 5       | Mean    |      |                                                                                                                                                                                                                                                                                                                                                                                                                                                                      |
|                                                        | Oral health of child improved after crowns: n (%)                                          |                                                              | 0 (0)                   | 1 (6)  | 0 (0)   | 2(11)                    | 15(83)  | 4.7     |      |                                                                                                                                                                                                                                                                                                                                                                                                                                                                      |
|                                                        | Parents concern about appearance before the crowns: n (%)                                  |                                                              | 2 (11)                  | 0 (0)  | 2 (11)  | 5 (28)                   | 9 (50)  | 4.1     |      |                                                                                                                                                                                                                                                                                                                                                                                                                                                                      |
|                                                        | Child avoided smiling before crowns: n (%)                                                 |                                                              | 15 (83)                 | 0 (0)  | 2 (11)  | 1 (6)                    | 0 (0)   | 1.4     |      |                                                                                                                                                                                                                                                                                                                                                                                                                                                                      |
|                                                        | Child smiled after crowns: n (%)                                                           |                                                              | 1 (5.5)                 | 0 (0)  | 5 (28)  | 1 (5.5)                  | 11 (61) | 4.2     |      |                                                                                                                                                                                                                                                                                                                                                                                                                                                                      |
| Crowns improved appearance of the child's teeth: n (%) | 0 (0)                                                                                      | 0 (0)                                                        | 1 (6)                   | 3 (16) | 14 (78) | 4.7                      |         |         |      |                                                                                                                                                                                                                                                                                                                                                                                                                                                                      |
| 1) Parental acceptance                                 |                                                                                            | Total number of teeth in each group (N)=43                   |                         |        |         |                          |         |         |      |                                                                                                                                                                                                                                                                                                                                                                                                                                                                      |

|                            |                                                                          |                                                                                    |                                                                                |  |              |               |               |                                                                                                                                                                                                                                                                                                                                                    |
|----------------------------|--------------------------------------------------------------------------|------------------------------------------------------------------------------------|--------------------------------------------------------------------------------|--|--------------|---------------|---------------|----------------------------------------------------------------------------------------------------------------------------------------------------------------------------------------------------------------------------------------------------------------------------------------------------------------------------------------------------|
| Salami et al., 2015 [21]   | 2) Future treatment choice                                               | Likert scale rating of satisfaction from 1 (very unsatisfied) - 5 (very satisfied) | <b>Parental Acceptance</b>                                                     |  | <b>RCSC</b>  | <b>PVSSC</b>  | <b>ZZC</b>    | The results showed that ZZC (4.6) scored high overall satisfaction levels than RCSCs (4.0) and PVSSCs (3.8). A significant relationship was found between color of PVSSC ( $p=0.003$ ) and durability of RCSC ( $p=0.009$ ). Moreover, all parents (100%) who chose ZZCs for their children would choose to treat them again with the same crowns. |
|                            |                                                                          |                                                                                    | <b>Size: Mean</b>                                                              |  | 4.3          | 4             | 4.2           |                                                                                                                                                                                                                                                                                                                                                    |
|                            |                                                                          |                                                                                    | <b>Color: Mean</b>                                                             |  | 4.3          | 3             | 4.1           |                                                                                                                                                                                                                                                                                                                                                    |
|                            |                                                                          |                                                                                    | <b>Shape: Mean</b>                                                             |  | 4.2          | 4             | 4.3           |                                                                                                                                                                                                                                                                                                                                                    |
|                            |                                                                          |                                                                                    | <b>Durability: Mean</b>                                                        |  | 3.1          | 3.9           | 4.7           |                                                                                                                                                                                                                                                                                                                                                    |
|                            |                                                                          |                                                                                    | <b>Overall Satisfaction: Mean</b>                                              |  | 4            | 3.8           | 4.6           |                                                                                                                                                                                                                                                                                                                                                    |
|                            |                                                                          |                                                                                    | <b>Pain and Discomfort: Mean</b>                                               |  | 2.2          | 1.65          | 1.95          |                                                                                                                                                                                                                                                                                                                                                    |
|                            |                                                                          |                                                                                    |                                                                                |  |              |               |               |                                                                                                                                                                                                                                                                                                                                                    |
|                            |                                                                          |                                                                                    | <b>Future Treatment Choice</b>                                                 |  | <b>RCSC</b>  | <b>PVSSC</b>  | <b>ZZC</b>    |                                                                                                                                                                                                                                                                                                                                                    |
|                            |                                                                          |                                                                                    | <b>Yes: n (%)</b>                                                              |  | 10 (77)      | 10 (83)       | 13 (100)      |                                                                                                                                                                                                                                                                                                                                                    |
|                            |                                                                          |                                                                                    | <b>No: n (%)</b>                                                               |  | 3 (23)       | 2 (17)        | 0 (0)         |                                                                                                                                                                                                                                                                                                                                                    |
| Vaishali et al., 2019 [46] | Esthetic acceptability of treatment for anterior teeth with deep caries. | A questionnaire                                                                    | <b>Total number of participants = 125</b>                                      |  |              |               |               | The results showed that among both children and their parents ZCs was the most acceptable treatment (65% and 76%) respectively, when used as full-coverage restoration for primary anterior teeth.                                                                                                                                                 |
|                            |                                                                          |                                                                                    | <b>Esthetic acceptability of treatment for anterior teeth with deep caries</b> |  | <b>Child</b> | <b>Mother</b> | <b>Father</b> |                                                                                                                                                                                                                                                                                                                                                    |
|                            |                                                                          |                                                                                    | <b>No treatment: (%)</b>                                                       |  | 6            | 3             | 4             |                                                                                                                                                                                                                                                                                                                                                    |
|                            |                                                                          |                                                                                    | <b>PVSSC: (%)</b>                                                              |  | 13           | 9             | 8             |                                                                                                                                                                                                                                                                                                                                                    |
|                            |                                                                          |                                                                                    | <b>RCSC: (%)</b>                                                               |  | 16           | 12            | 10            |                                                                                                                                                                                                                                                                                                                                                    |
|                            |                                                                          |                                                                                    | <b>ZC: (%)</b>                                                                 |  | 65           | 76            | 78            |                                                                                                                                                                                                                                                                                                                                                    |
| Pani et al., 2016 [47]     | Esthetic acceptability of treatment for anterior teeth with deep caries. | A questionnaire                                                                    | <b>Total number of participants = 125</b>                                      |  |              |               |               | The results showed that there was no significant difference between parents and their children in the acceptability of any of the treatment modalities ex-                                                                                                                                                                                         |
|                            |                                                                          |                                                                                    | <b>Esthetic acceptability of treatment for anterior teeth with deep caries</b> |  | <b>Child</b> | <b>Mother</b> | <b>Father</b> |                                                                                                                                                                                                                                                                                                                                                    |
|                            |                                                                          |                                                                                    | <b>No treatment: n (%)</b>                                                     |  | 5 (4.7)      | 5 (4.7)       | 4 (4.3)       |                                                                                                                                                                                                                                                                                                                                                    |
|                            |                                                                          |                                                                                    | <b>PVSSC: n (%)</b>                                                            |  | 11 (10.3)    | 5 (4.7)       | 4 (3.7)       |                                                                                                                                                                                                                                                                                                                                                    |



|                                     |                       |                                                                  |                                                             |           |      |           |      |           |  |                                                                                                                                                                                                                                                                                                                                                                                                                                       |
|-------------------------------------|-----------------------|------------------------------------------------------------------|-------------------------------------------------------------|-----------|------|-----------|------|-----------|--|---------------------------------------------------------------------------------------------------------------------------------------------------------------------------------------------------------------------------------------------------------------------------------------------------------------------------------------------------------------------------------------------------------------------------------------|
|                                     |                       |                                                                  | RCSC: n (%)                                                 | 19 (17.8) |      | 20 (18.7) |      | 16 (18.7) |  | cept for PVSSC, which were significantly more acceptable to children than their parents.                                                                                                                                                                                                                                                                                                                                              |
|                                     |                       |                                                                  | ZC: n (%)                                                   | 75 (70.1) |      | 87 (81.3) |      | 85 (79.4) |  |                                                                                                                                                                                                                                                                                                                                                                                                                                       |
| Mathew et al., 2020 <sup>[49]</sup> | Parental satisfaction | Likert type scale from 1 (very unsatisfied) - 5 (very satisfied) | Comparison of parental satisfaction of SSC and zirconia (%) |           |      |           |      |           |  | The results showed that only 12 parents (40%) were satisfied with the color of SSCs, whereas with ZCs, all parents (100%) were satisfied with color. A significant statistical difference (P<0.001) was present between both groups. Moreover, all patients (100%) were satisfied with ZCs, but only 16 of the patients (53.3) were satisfied with SSCs. A significant statistical difference (P<0.001) was seen between both groups. |
|                                     |                       |                                                                  | Total number of teeth in each group (N)=30                  |           |      |           |      |           |  |                                                                                                                                                                                                                                                                                                                                                                                                                                       |
|                                     |                       |                                                                  | ZC                                                          | 6 m       | 12 m | 18 m      | 24 m | 36 m      |  |                                                                                                                                                                                                                                                                                                                                                                                                                                       |
|                                     |                       |                                                                  | Color                                                       | 100       | 100  | 100       | 100  | 100       |  |                                                                                                                                                                                                                                                                                                                                                                                                                                       |
|                                     |                       |                                                                  | Shape                                                       | 100       | 100  | 100       | 100  | 100       |  |                                                                                                                                                                                                                                                                                                                                                                                                                                       |
|                                     |                       |                                                                  | Size                                                        | 100       | 100  | 100       | 100  | 100       |  |                                                                                                                                                                                                                                                                                                                                                                                                                                       |
|                                     |                       |                                                                  | Retention                                                   | 100       | 100  | 100       | 100  | 100       |  |                                                                                                                                                                                                                                                                                                                                                                                                                                       |
|                                     |                       |                                                                  | Durability                                                  | 100       | 100  | 100       | 100  | 100       |  |                                                                                                                                                                                                                                                                                                                                                                                                                                       |
|                                     |                       |                                                                  | Overall satisfaction                                        | 100       | 100  | 100       | 100  | 100       |  |                                                                                                                                                                                                                                                                                                                                                                                                                                       |
|                                     |                       |                                                                  | Child satisfaction                                          | 100       | 100  | 100       | 100  | 100       |  |                                                                                                                                                                                                                                                                                                                                                                                                                                       |
|                                     |                       |                                                                  | SSC                                                         |           |      |           |      |           |  |                                                                                                                                                                                                                                                                                                                                                                                                                                       |
|                                     |                       |                                                                  | Color                                                       | 40        | 40   | 40        | 40   | 40        |  |                                                                                                                                                                                                                                                                                                                                                                                                                                       |
|                                     |                       |                                                                  | Shape                                                       | 100       | 100  | 100       | 100  | 100       |  |                                                                                                                                                                                                                                                                                                                                                                                                                                       |
|                                     |                       |                                                                  | Size                                                        | 100       | 100  | 100       | 100  | 100       |  |                                                                                                                                                                                                                                                                                                                                                                                                                                       |
|                                     |                       |                                                                  | Retention                                                   | 100       | 100  | 100       | 100  | 100       |  |                                                                                                                                                                                                                                                                                                                                                                                                                                       |
|                                     |                       |                                                                  | Durability                                                  | 100       | 100  | 100       | 100  | 100       |  |                                                                                                                                                                                                                                                                                                                                                                                                                                       |
|                                     |                       |                                                                  | Overall satisfaction                                        | 100       | 100  | 100       | 100  | 100       |  |                                                                                                                                                                                                                                                                                                                                                                                                                                       |
|                                     |                       |                                                                  | Child satisfaction                                          | 53.3      | 53.3 | 53.3      | 53.3 | 53.3      |  |                                                                                                                                                                                                                                                                                                                                                                                                                                       |
| Gill et al., 2020 <sup>[38]</sup>   | Parental satisfaction | A questionnaire                                                  | -                                                           |           |      |           |      |           |  | The results showed that NSZ had the highest parental esthetic satisfaction when compared to RCSC and PVSSC.                                                                                                                                                                                                                                                                                                                           |
| 1: Highly satisfied                 |                       |                                                                  | Parents Satisfaction                                        |           |      |           |      |           |  |                                                                                                                                                                                                                                                                                                                                                                                                                                       |

|                             |                                        |                                               |            |                                                                      |        |        |                                                                      |       |         |                                                                                                                                                                                                                                                                                                                        |
|-----------------------------|----------------------------------------|-----------------------------------------------|------------|----------------------------------------------------------------------|--------|--------|----------------------------------------------------------------------|-------|---------|------------------------------------------------------------------------------------------------------------------------------------------------------------------------------------------------------------------------------------------------------------------------------------------------------------------------|
| Talekar et al. 2021<br>[64] | 2: Neutral<br>3= Strongly dissatisfied | A questionnaire at two periods: 12 m and 18 m |            | 12 m<br>Total number of GFRC = 30 (%)<br>Total number of NSZ= 31 (%) |        |        | 18 m<br>Total number of GFRC = 28 (%)<br>Total number of NSZ= 30 (%) |       |         | The results showed that among all 31 NSZ, 87% were satisfied for both periods. Almost half of FIGARO (57%) were satisfied at 12 m. The percentage of not satisfied parents increased to 32% at 18 m period with significant differences between both crowns in all periods 12 months (P=0.02) and 18 months (P<0.001). |
|                             |                                        |                                               | Score      | 1                                                                    | 2      | 3      | 1                                                                    | 2     | 3       |                                                                                                                                                                                                                                                                                                                        |
|                             |                                        |                                               | GFRC n (%) | 19 (57)                                                              | 8 (34) | 3 (9)  | 17 (68)                                                              | 0 (0) | 11 (32) |                                                                                                                                                                                                                                                                                                                        |
|                             |                                        |                                               | NSZ n (%)  | 29 (87)                                                              | 0 (0)  | 2 (13) | 28 (87)                                                              | 0 (0) | 2 (13)  |                                                                                                                                                                                                                                                                                                                        |
| Yanover et al., 2021[66]    | Parental satisfaction                  | A questionnaire                               | -          |                                                                      |        |        |                                                                      |       |         | The results showed that all the tested esthetic crowns have higher parental satisfaction in all aspects; color match, crown contour and crown durability.                                                                                                                                                              |

EZP, EZ Pedo crown; ZC, Zirconia crown; RCSC, Resin composite strip crown; PVSSC, Preveenerd stainless steel crown; ZCC, Zirkiz zirconia crown; SSC, Stainless steel crown; NSZ, NuSmile Zirconia crown; GFRC, Glass fiber-reinforced composite crown - Figaro Crowns.

**Supplemental Table S3.** Summary of the included studies' findings about the color stability of zirconia crowns for primary teeth.

| Study                       | Assessment Score                                | Time of Evaluation          | Results                 |         |                |         | Summary of Results                                              |
|-----------------------------|-------------------------------------------------|-----------------------------|-------------------------|---------|----------------|---------|-----------------------------------------------------------------|
| Taran et al., 2018 [30]     | 0=No staining                                   | At 1,3,6 and 12 m           | Total number of NSZ= 15 |         |                |         | The results showed Minor staining was detected in only one NSZ. |
|                             | 1=Minor staining                                |                             |                         | Score 0 | Score 1 at 3 m | Score 2 |                                                                 |
|                             | 2=Noticeable staining                           |                             | n (%)                   | 14 (93) | 1 (7)          | 0 (0)   |                                                                 |
| Holsinger et al., 2016 [44] | 0= No noticeable difference from adjacent teeth | 2010 – 2014 (Not specified) | Total number of EZP= 44 |         |                |         | The results showed Shade mismatch was reported in 36% of EZP.   |
|                             | 1= Slight shade mismatch                        |                             | Score                   | 0       | 1              | 2       |                                                                 |
|                             | 2= Obvious shade mismatch                       |                             | n (%)                   | 28 (64) | 14 (32)        | 2 (4)   |                                                                 |

|                                        |                                                   |                       |                                              |             |          |               |          |              |          |               |                                                                                                                                                          |                                                                                                                                                                                                                     |       |
|----------------------------------------|---------------------------------------------------|-----------------------|----------------------------------------------|-------------|----------|---------------|----------|--------------|----------|---------------|----------------------------------------------------------------------------------------------------------------------------------------------------------|---------------------------------------------------------------------------------------------------------------------------------------------------------------------------------------------------------------------|-------|
| Mathew et al., 2020 <sup>[49]</sup>    | 0=No staining                                     | At 6, 12, 24 and 36 m | Total number of teeth in each group (N) =30  |             |          |               |          |              |          |               | The results showed that Both SSC and KKZ reported a successful clinical outcome of 100% with no staining.                                                |                                                                                                                                                                                                                     |       |
|                                        | 1=Minor staining                                  |                       |                                              | Score 0-6 m |          | Score 0- 12 m |          | Score 0-24 m |          | Score 0-36 m  |                                                                                                                                                          |                                                                                                                                                                                                                     |       |
|                                        | 2=Noticeable staining                             |                       | SSC: n (%)                                   | 30 (100)    |          | 30 (100)      |          | 30 (100)     |          | 30 (100)      |                                                                                                                                                          |                                                                                                                                                                                                                     |       |
|                                        | KKZ: n (%)                                        |                       | 30 (100)                                     |             | 30 (100) |               | 30 (100) |              | 30 (100) |               |                                                                                                                                                          |                                                                                                                                                                                                                     |       |
| Donly et al., 2018 <sup>[55]</sup>     | <b>Color match (only for ZC):</b>                 | At 6,12 and 24 m      | Total number of teeth in each group (N) =43  |             |          |               |          |              |          |               |                                                                                                                                                          | The results showed that there was no statistically significant difference (p<0.05) in the clinical performance (stain resistance, color match and marginal discoloration) at all time-points (6, 12 and 24 months). |       |
|                                        | 0= No mismatch                                    |                       |                                              | 6 m         |          |               | 12 m     |              |          | 24 m          |                                                                                                                                                          |                                                                                                                                                                                                                     |       |
|                                        | 1= Acceptable with a color mismatch               |                       | Score                                        | 0           | 1        | 2             | 0        | 1            | 2        | 0             | 1                                                                                                                                                        |                                                                                                                                                                                                                     | 2     |
|                                        | 2= Unacceptable with a color mismatch             |                       | Color match NSZ: n (%)                       | 33 (77)     | 10 (23)  | 0 (0)         | 29 (67)  | 14 (33)      | 0 (0)    | 17 (44)       | 19 (56)                                                                                                                                                  |                                                                                                                                                                                                                     | 0 (0) |
|                                        | <b>Staining:</b>                                  |                       | Staining NSZ: n (%)                          | 27 (63)     | 16 (37)  | 0 (0)         | 31 (72)  | 12 (28)      | 0 (0)    | 29 (74)       | 7 (18)                                                                                                                                                   |                                                                                                                                                                                                                     | 0 (0) |
|                                        | 0= No staining                                    |                       | Staining SSC: n (%)                          | 43 (100)    | 0 (0)    | 0 (0)         | 39 (90)  | 2 (10)       | 0 (0)    | 31 (79)       | 1 (2.5)                                                                                                                                                  |                                                                                                                                                                                                                     | 0 (0) |
|                                        | 1= Staining that could be polished away           |                       | Marginal discoloration NSZ: n (%)            | 43 (100)    | 0 (0)    | 0 (0)         | 43 (100) | 0 (0)        | 0 (0)    | 36 (92)       | 0 (0)                                                                                                                                                    |                                                                                                                                                                                                                     | 0 (0) |
|                                        | 2= Heavy staining that could not be polished away |                       | Marginal discoloration SSC: n (%)            | 43 (100)    | 0 (0)    | 0 (0)         | 42 (98)  | 0 (0)        | 0 (0)    | 34 (87)       | 0 (0)                                                                                                                                                    |                                                                                                                                                                                                                     | 0 (0) |
|                                        | <b>Marginal discoloration:</b>                    |                       |                                              |             |          |               |          |              |          |               |                                                                                                                                                          |                                                                                                                                                                                                                     |       |
| Padmanabh et al., 2021 <sup>[57]</sup> | Color change:                                     | NA                    | Total number of teeth in each group (N) = 20 |             |          |               |          |              |          |               | The results showed that there was no change of the color after sterilization between different types of crowns, in both control and experimental groups. |                                                                                                                                                                                                                     |       |
|                                        | 0= No change                                      |                       | Score                                        | 0           |          |               |          | 1            |          |               |                                                                                                                                                          |                                                                                                                                                                                                                     |       |
|                                        | 1= change in color                                |                       | PVSSC n (%)                                  | 20 (100)    |          |               |          | 0            |          |               |                                                                                                                                                          |                                                                                                                                                                                                                     |       |
|                                        |                                                   |                       | SSC n (%)                                    | 20 (100)    |          |               |          | 0            |          |               |                                                                                                                                                          |                                                                                                                                                                                                                     |       |
|                                        |                                                   |                       | ZC n (%)                                     | 20 (100)    |          |               |          | 0            |          |               |                                                                                                                                                          |                                                                                                                                                                                                                     |       |
| Gill et al., 2020 <sup>[38]</sup>      |                                                   | At 12 m               | Total number of teeth = 135                  |             |          |               |          |              |          |               | The results showed that (98%) of ZCs completely matched or were                                                                                          |                                                                                                                                                                                                                     |       |
|                                        |                                                   |                       | Score                                        | 0           |          | 1             |          | 2            |          | Missing n (%) |                                                                                                                                                          |                                                                                                                                                                                                                     |       |

|                                      |                                                                                                                                                                                                      |                                        |                                                    |                                                                         |         |          |                                                                      |                                                                                                                                                                                       |                                                                                                                                                                                                                                            |
|--------------------------------------|------------------------------------------------------------------------------------------------------------------------------------------------------------------------------------------------------|----------------------------------------|----------------------------------------------------|-------------------------------------------------------------------------|---------|----------|----------------------------------------------------------------------|---------------------------------------------------------------------------------------------------------------------------------------------------------------------------------------|--------------------------------------------------------------------------------------------------------------------------------------------------------------------------------------------------------------------------------------------|
|                                      | 0= Matches completely or within range of shade and translucency<br>1= Outside range for yellow, yellow/ brown, or grey discoloration<br>2= Outside range for reason other than yellowing or gray-ing |                                        | RCSC n (%)                                         | 21 (44)                                                                 | 23 (48) | 3 (6)    | 1 (2)                                                                | within the range of shade and translucency due to the highly polished surface of ZCs which can prevent staining and accumulation of plaque from changing the color.                   |                                                                                                                                                                                                                                            |
|                                      |                                                                                                                                                                                                      |                                        | PVSSC n (%)                                        | 47 (100)                                                                | 0 (0)   | 0 (0)    | 0 (0)                                                                |                                                                                                                                                                                       |                                                                                                                                                                                                                                            |
|                                      |                                                                                                                                                                                                      |                                        | NSZ n (%)                                          | 39 (98)                                                                 | 0 (0)   | 0 (0)    | 1 (2)                                                                |                                                                                                                                                                                       |                                                                                                                                                                                                                                            |
|                                      |                                                                                                                                                                                                      |                                        | Total n (%)                                        | 107 (79)                                                                | 23 (17) | 3 (2)    | 2 (2)                                                                |                                                                                                                                                                                       |                                                                                                                                                                                                                                            |
| Sharma et al., 2021 <sup>[62]</sup>  | 0= No noticeable difference from adjacent teeth<br>1= Slight shade mismatch<br>2= Obvious shade mismatch                                                                                             | At 12 m                                | Total number of RCSC =17<br>Total number of ZC =19 |                                                                         |         |          |                                                                      | The results showed that (68.4%) of ZCs had no noticeable change in color when compared to RCSC and After 12 months of follow up but not statistically significant difference (0.168). |                                                                                                                                                                                                                                            |
|                                      |                                                                                                                                                                                                      |                                        | Score                                              | 0                                                                       |         | 1        | 2                                                                    |                                                                                                                                                                                       |                                                                                                                                                                                                                                            |
|                                      |                                                                                                                                                                                                      |                                        | RCSC n (%)                                         | 6 (35)                                                                  |         | 9 (52.9) | 2 (11.7)                                                             |                                                                                                                                                                                       |                                                                                                                                                                                                                                            |
|                                      |                                                                                                                                                                                                      |                                        | NSZ n (%)                                          | 13 (68.4)                                                               |         | 5 (26.3) | 1 (5.2)                                                              |                                                                                                                                                                                       |                                                                                                                                                                                                                                            |
| Yanover et al., 2020 <sup>[63]</sup> | 0= No noticeable difference from adjacent teeth<br>1= Slight shade mismatch<br>2= Obvious shade mismatch                                                                                             | At 6-10.4m<br>12.5-17.9m<br>18.4-33.8m | Total Number of ZC=131                             |                                                                         |         |          |                                                                      | The results showed that 47 teeth (36%) scored (0), and 79 teeth (60%) scored (1), and only 5 teeth (4%) scored (2).                                                                   |                                                                                                                                                                                                                                            |
|                                      |                                                                                                                                                                                                      |                                        | Score                                              | 0                                                                       |         | 1        | 2                                                                    |                                                                                                                                                                                       |                                                                                                                                                                                                                                            |
|                                      |                                                                                                                                                                                                      |                                        | n(%)                                               | 47(36)                                                                  |         | 79(60)   | 5(4)                                                                 |                                                                                                                                                                                       |                                                                                                                                                                                                                                            |
| Talekar et al. 2021 <sup>[64]</sup>  | Stain resistance<br>0: No staining<br>1: Mild staining could be polished<br>2= heavy staining cannot be polished                                                                                     | At 12 m<br>and 18 m                    |                                                    | At 12 m<br>Total number of GFRC = 30 (%)<br>Total number of NSZ= 31 (%) |         |          | At 18 m<br>Total number of GFRC = 28 (%) Total number of NSZ= 30 (%) |                                                                                                                                                                                       | The results no staining in NSZ crown in both periods. On the other hand, 73% of the GFRC group had mild to heavy staining in the first 12 m period, this percentage increased to 86% at 18 m period. Significant differences of (P <0.001) |
|                                      |                                                                                                                                                                                                      |                                        | Score                                              | 0                                                                       | 1       | 2        | 0                                                                    | 1                                                                                                                                                                                     |                                                                                                                                                                                                                                            |

|                                                                                                                                |                      |                      |                                                                            |         |          |          |          |         |                                                                                                                               |
|--------------------------------------------------------------------------------------------------------------------------------|----------------------|----------------------|----------------------------------------------------------------------------|---------|----------|----------|----------|---------|-------------------------------------------------------------------------------------------------------------------------------|
| <b>Color match</b><br>0= No noticeable difference from adjacent teeth<br>1= Slight shade mismatch<br>2= Obvious shade mismatch | Upon crown selection | <b>GFRC<br/>n(%)</b> | 8 (27)                                                                     | 12 (40) | 10 (33)  | 4 (14)   | 14 (50)  | 10 (36) | between both groups at the two periods.                                                                                       |
|                                                                                                                                |                      | <b>NSZ<br/>n (%)</b> | 31 (100)                                                                   | 0 (0)   | 0 (0)    | 30 (100) | 0 (0)    | 0 (0)   |                                                                                                                               |
|                                                                                                                                |                      |                      | <b>Total number of GFRC = 33 (%)</b><br><b>Total number of NSZ= 33 (%)</b> |         |          |          |          |         |                                                                                                                               |
|                                                                                                                                |                      | <b>Score</b>         | <b>0</b>                                                                   |         | <b>1</b> |          | <b>2</b> |         | All the NSZ were matched the natural color of the adjacent teeth and half of the GFRC had a notable mismatching of the color. |
|                                                                                                                                |                      | <b>GFRC<br/>n(%)</b> | 19 (58)                                                                    |         | 11 (33)  |          | 3 (9)    |         |                                                                                                                               |
|                                                                                                                                |                      | <b>NSZ<br/>n (%)</b> | 30 (100)                                                                   |         | 0        |          | 0        |         |                                                                                                                               |

Abbreviations: NSZ, NuSmile Zirconia crown; EZP, EZ Pedo crown; SSC, Stainless steel crown; KKZ, Kinder Krown Zirconia crown; ZC, Zirconia crown; PVSSC, Preveneerd stainless steel crown; RCSC, Resin composite strip crown; NA, Not Applicable; GFRC, Glass fiber-reinforced composite crown - Figaro Crowns; DCR, Direct composite restoration.

**Supplemental Table S4.** Summary of the included studies' findings about the retention of zirconia crowns for primary teeth.

| Study                   | Assessment Score/Method                          | Time of Evaluation  | Results                                    |          |         |         |         | Summary of Results                                                                                                                                                        |
|-------------------------|--------------------------------------------------|---------------------|--------------------------------------------|----------|---------|---------|---------|---------------------------------------------------------------------------------------------------------------------------------------------------------------------------|
| Taran et al., 2018 [30] | 0= Present (Retained)                            | At 1, 3, 6 and 12 m | Total number of teeth in each group (N)=15 |          |         |         |         | The results showed that SSC had a higher retention rate than NSZ.                                                                                                         |
|                         | 1= Absent (Lost)                                 |                     |                                            | Score 0  | Score 1 |         |         |                                                                                                                                                                           |
|                         |                                                  |                     | NSZ: n (%)                                 | 13 (87)  | 2 (13)  |         |         |                                                                                                                                                                           |
|                         |                                                  |                     | SSC: n (%)                                 | 15 (100) | 0 (0)   |         |         |                                                                                                                                                                           |
| Walia et al., 2014 [27] | 0= Normal                                        | At 6 m              | Total number of RCSC =36                   |          |         |         |         | The results showed that ZCC reported a higher retention rate than RCSC and PVSSC crowns. There was a statistically significant difference between RCSC and PVSSC (p=0.04) |
|                         | 1= Small but noticeable area of loss of material |                     | Total number of PVSSC =37                  |          |         |         |         |                                                                                                                                                                           |
|                         | 2= Large loss of material                        |                     | Total number of ZCC =38                    |          |         |         |         |                                                                                                                                                                           |
|                         | 3= Complete loss                                 |                     |                                            | Score 0  | Score 1 | Score 2 | Score 3 |                                                                                                                                                                           |
|                         |                                                  |                     | RCSC: n (%)                                | 28 (78)  | 2 (5)   | 0 (0)   | 6 (17)  |                                                                                                                                                                           |
|                         |                                                  |                     | PVSSC: n (%)                               | 35 (95)  | 2 (5)   | 0 (0)   | 0 (0)   |                                                                                                                                                                           |

|                                        |                                                                                                                         |                                             |                                                   |                     |                     |                     |                     |                                                                                                                                                                                                                                                                                    |
|----------------------------------------|-------------------------------------------------------------------------------------------------------------------------|---------------------------------------------|---------------------------------------------------|---------------------|---------------------|---------------------|---------------------|------------------------------------------------------------------------------------------------------------------------------------------------------------------------------------------------------------------------------------------------------------------------------------|
|                                        |                                                                                                                         |                                             | <b>ZZC: n (%)</b>                                 | 38 (100)            | 0 (0)               | 0 (0)               | 0 (0)               | and between RCSC and ZZC (p=0.02).                                                                                                                                                                                                                                                 |
| Holsinger et al., 2016 <sup>[44]</sup> | 0= Intact<br>1= Chipped/small but noticeable area of loss of material<br>2= Large loss of material<br>3 = Complete loss | (Retrospective study)<br>2010 – 2014        | <b>Total number of EZP = 46</b>                   |                     |                     |                     |                     | The results showed that 96% of EZP were retained and only 4% were lost.                                                                                                                                                                                                            |
|                                        |                                                                                                                         |                                             |                                                   | <b>Score 0</b>      | <b>Score 1</b>      | <b>Score 2</b>      | <b>Score 3</b>      |                                                                                                                                                                                                                                                                                    |
|                                        |                                                                                                                         |                                             | <b>n (%)</b>                                      | 44 (96)             | 0 (0)               | 0 (0)               | 2 (4)               |                                                                                                                                                                                                                                                                                    |
| Jing et al., 2019 <sup>[45]</sup>      | Universal testing machine                                                                                               | NA                                          | <b>Total number of SEC = 46</b>                   |                     |                     |                     |                     | The result showed that there were significantly lower MPa between the 1 mm group and the rest of groups 2,3 and 4mm (P<0.001). There were no significant differences in MPa among the 2,3 and 4mm groups (P>0.05) and there was no difference in retention between the TC and NTC. |
|                                        |                                                                                                                         |                                             | <b>OCH Mean</b>                                   | <b>1 mm TC</b>      | <b>2 mm TC</b>      | <b>3 mm TC</b>      | <b>4 mm TC</b>      |                                                                                                                                                                                                                                                                                    |
|                                        |                                                                                                                         |                                             | Mean (Newtons)                                    | 116.0               | 251.4               | 319.3               | 431.5               |                                                                                                                                                                                                                                                                                    |
|                                        |                                                                                                                         |                                             | Mean (MPa)                                        | 1.7                 | 2.9                 | 3.1                 | 3.3                 |                                                                                                                                                                                                                                                                                    |
|                                        |                                                                                                                         |                                             | SD                                                | 1.0                 | 1.4                 | 0.7                 | 0.6                 |                                                                                                                                                                                                                                                                                    |
|                                        |                                                                                                                         |                                             | Range (MPa)                                       | 2.9                 | 4.3                 | 2.1                 | 2.3                 |                                                                                                                                                                                                                                                                                    |
| Mathew et al., 2020 <sup>[49]</sup>    | 0= Present (Retained)<br>1= Absent (Lost)                                                                               | At 6, 12, 24, and 36 m                      | <b>Total number of teeth in each group (N)=30</b> |                     |                     |                     |                     | The results showed that Both SSC and KKZ reported a 100% retention.                                                                                                                                                                                                                |
|                                        |                                                                                                                         |                                             |                                                   | <b>Score 0-6 m</b>  | <b>Score 0-12 m</b> | <b>Score 0-24 m</b> | <b>Score 0-36 m</b> |                                                                                                                                                                                                                                                                                    |
|                                        |                                                                                                                         |                                             | <b>SSC: n (%)</b>                                 | 30 (100)            | 30 (100)            | 30 (100)            | 30 (100)            |                                                                                                                                                                                                                                                                                    |
|                                        |                                                                                                                         |                                             | <b>KKZ: n (%)</b>                                 | 30 (100)            | 30 (100)            | 30 (100)            | 30 (100)            |                                                                                                                                                                                                                                                                                    |
| Azab et al., <sup>[54]</sup>           | By visual inspection and probe to detect debonded crowns                                                                | At 1 week, 1, 3, 6, 9, 12, 18, 24, and 36 m | <b>Retained Crowns</b>                            |                     |                     |                     |                     | The results showed that there were statistically significant more retained and less debonded crowns for packable GI group compared to bio-                                                                                                                                         |
|                                        |                                                                                                                         |                                             | <b>Cement type</b>                                | <b>N=25<br/>1 w</b> | <b>N=24<br/>1 m</b> | <b>N=22<br/>3 m</b> | <b>N=21<br/>6 m</b> |                                                                                                                                                                                                                                                                                    |
|                                        |                                                                                                                         |                                             | <b>Bio-active cement</b>                          | 23 (92)             | 19 (79)             | 13 (62)             | 10 (48)             |                                                                                                                                                                                                                                                                                    |

|                                         |                                                                                                                |                          |                                             |              |              |              |                                                        |         |                                               |                                                                                                                                                                                           |               |         |         |                                                                                                                                                                                                                       |       |   |
|-----------------------------------------|----------------------------------------------------------------------------------------------------------------|--------------------------|---------------------------------------------|--------------|--------------|--------------|--------------------------------------------------------|---------|-----------------------------------------------|-------------------------------------------------------------------------------------------------------------------------------------------------------------------------------------------|---------------|---------|---------|-----------------------------------------------------------------------------------------------------------------------------------------------------------------------------------------------------------------------|-------|---|
|                                         |                                                                                                                |                          | Packable GIC                                | 24 (96)      | 23 (95)      | 21 (95)      | 20 (95)                                                | 20 (95) | active cement group at 3–36-month follow-ups. |                                                                                                                                                                                           |               |         |         |                                                                                                                                                                                                                       |       |   |
|                                         |                                                                                                                |                          |                                             | N=21<br>12 m | N=21<br>18 m | N=21<br>24 m | N=19 (Bioactive Cement)<br>N=17 (Packable GIC)<br>36 m |         |                                               |                                                                                                                                                                                           |               |         |         |                                                                                                                                                                                                                       |       |   |
|                                         |                                                                                                                |                          | Bioactive cement                            | 7 (33.3)     | 7 (33.3)     | 7 (33.3)     | 4 (21)                                                 |         |                                               |                                                                                                                                                                                           |               |         |         |                                                                                                                                                                                                                       |       |   |
|                                         |                                                                                                                |                          | Packable GIC                                | 20 (95)      | 20 (95)      | 20 (95)      | 14 (82)                                                |         |                                               |                                                                                                                                                                                           |               |         |         |                                                                                                                                                                                                                       |       |   |
| Al Shahawy et al., 2016 <sup>[37]</sup> | Clinically and radiographically                                                                                | At 3, 6, 12, 18 and 24 m | Total number of NSZ =86                     |              |              |              |                                                        |         |                                               | The results showed that (91%) of NSZ were retained and only (9%) dislodged after 24-months. The overall survival of the restorations was 95.3% after 12 months and 80.2% after 24 months. |               |         |         |                                                                                                                                                                                                                       |       |   |
|                                         |                                                                                                                |                          |                                             | 3 m          | 6 m          | 12 m         | 18 m                                                   | 24 m    |                                               |                                                                                                                                                                                           |               |         |         |                                                                                                                                                                                                                       |       |   |
|                                         |                                                                                                                |                          | n (%)                                       | 86 (100)     | 85 (98)      | 77 (96)      | 68 (92)                                                | 61 (91) |                                               |                                                                                                                                                                                           |               |         |         |                                                                                                                                                                                                                       |       |   |
| Gill et al., 2020 <sup>[38]</sup>       | 0= Intact<br>1= Partially missing<br>2= Missing-some cement remaining on both tooth and crown interior         | At 12 m                  | Total number of teeth = 135                 |              |              |              |                                                        |         |                                               | The results showed that (95%) of NSZ were intact after 12 months follow up.                                                                                                               |               |         |         |                                                                                                                                                                                                                       |       |   |
|                                         |                                                                                                                |                          | Score                                       | 0            |              | 1            |                                                        | 2       |                                               |                                                                                                                                                                                           | Missing n (%) |         |         |                                                                                                                                                                                                                       |       |   |
|                                         |                                                                                                                |                          | RCSC n (%)                                  | 38 (79)      |              | 6 (13)       |                                                        | 3 (6)   |                                               |                                                                                                                                                                                           | 1 (2)         |         |         |                                                                                                                                                                                                                       |       |   |
|                                         |                                                                                                                |                          | PVSSC n (%)                                 | 47 (100)     |              | 0 (0)        |                                                        | 0 (0)   |                                               |                                                                                                                                                                                           | 0 (0)         |         |         |                                                                                                                                                                                                                       |       |   |
|                                         |                                                                                                                |                          | NSZ n (%)                                   | 38 (95)      |              | 1 (3)        |                                                        | 0 (0)   |                                               |                                                                                                                                                                                           | 1 (3)         |         |         |                                                                                                                                                                                                                       |       |   |
|                                         |                                                                                                                |                          | Total n (%)                                 | 123 (91)     |              | 7 (5)        |                                                        | 3 (2)   |                                               |                                                                                                                                                                                           | 2 (2)         |         |         |                                                                                                                                                                                                                       |       |   |
| Alaki et al., 2020 <sup>[58]</sup>      | 0= Crown appears normal<br>1= Small but noticeable area of loss of material<br>2= Large loss of crown material | At 3, 6 and 12 m         | Total number of teeth in each group (N) =60 |              |              |              |                                                        |         |                                               |                                                                                                                                                                                           |               |         |         | The results showed that there were no crown failures up to 3 months follow up in both groups, in ZC group 2 crowns had lost due to trauma in 6 and 12 follow up, while failure was noticed more in RCSC group in both |       |   |
|                                         |                                                                                                                |                          |                                             | 3m           |              |              |                                                        | 6m      |                                               |                                                                                                                                                                                           |               | 12m     |         |                                                                                                                                                                                                                       |       |   |
|                                         |                                                                                                                |                          | Score                                       | 0            | 1            | 2            | 3                                                      | 0       | 1                                             | 2                                                                                                                                                                                         | 3             | 0       | 1       |                                                                                                                                                                                                                       | 2     | 3 |
|                                         |                                                                                                                |                          | RCSC n (%)                                  | 60 (100)     | 0            | 0            | 0                                                      | 52 (87) | 7 (12)                                        | 1 (1)                                                                                                                                                                                     | 0             | 37 (62) | 18 (30) |                                                                                                                                                                                                                       | 5 (8) | 0 |

|                                       |                                                                                                                                              |                          |             |                                                                         |                   |           |            |                                                                         |                      |          |            |                                                                                                                                                                                                                                                                             |         |          |                                                                                                                                                                                                                                                       |  |
|---------------------------------------|----------------------------------------------------------------------------------------------------------------------------------------------|--------------------------|-------------|-------------------------------------------------------------------------|-------------------|-----------|------------|-------------------------------------------------------------------------|----------------------|----------|------------|-----------------------------------------------------------------------------------------------------------------------------------------------------------------------------------------------------------------------------------------------------------------------------|---------|----------|-------------------------------------------------------------------------------------------------------------------------------------------------------------------------------------------------------------------------------------------------------|--|
|                                       | 3= Complete loss of crown                                                                                                                    | ZC<br>n (%)              | 60<br>(100) | 0                                                                       | 0                 | 0         | 59<br>(98) | 0                                                                       | 0                    | 1<br>(2) | 58<br>(98) | 0                                                                                                                                                                                                                                                                           | 0       | 1<br>(2) | intervals of follow up 6 and 12 months.                                                                                                                                                                                                               |  |
| Alhissan et al., 2021 <sup>[59]</sup> | 0= No clinical failure At 24 m<br>1= Debonding without complications<br>2= Debonding with complications<br>3= Failure without debonding      | Total number of ZC =70   |             |                                                                         |                   |           |            |                                                                         |                      |          |            |                                                                                                                                                                                                                                                                             |         |          | The results showed that out of the 70 ZCs studied over 24 months, 14 crowns had failed, giving an overall success rate of 80%. The success rate of crowns with pulp treatment was significantly lower (76%) than crowns without pulp treatment (90%). |  |
|                                       |                                                                                                                                              | Score                    |             |                                                                         | With pulp therapy |           |            |                                                                         | Without pulp therapy |          |            |                                                                                                                                                                                                                                                                             |         |          |                                                                                                                                                                                                                                                       |  |
|                                       |                                                                                                                                              | 0                        |             |                                                                         | 18                |           |            |                                                                         | 38                   |          |            |                                                                                                                                                                                                                                                                             |         |          |                                                                                                                                                                                                                                                       |  |
|                                       |                                                                                                                                              | 1                        |             |                                                                         | 2                 |           |            |                                                                         | 8                    |          |            |                                                                                                                                                                                                                                                                             |         |          |                                                                                                                                                                                                                                                       |  |
|                                       |                                                                                                                                              | 2                        |             |                                                                         | 0                 |           |            |                                                                         | 3                    |          |            |                                                                                                                                                                                                                                                                             |         |          |                                                                                                                                                                                                                                                       |  |
|                                       |                                                                                                                                              | 3                        |             |                                                                         | 0                 |           |            |                                                                         | 1                    |          |            |                                                                                                                                                                                                                                                                             |         |          |                                                                                                                                                                                                                                                       |  |
|                                       |                                                                                                                                              | Total                    |             |                                                                         | 20                |           |            |                                                                         | 50                   |          |            |                                                                                                                                                                                                                                                                             |         |          |                                                                                                                                                                                                                                                       |  |
| Sharma et al., 2021 <sup>[62]</sup>   | 0= Crown appears normal:<br>1= Small but noticeable area of loss of material<br>2= Large loss of crown material<br>3= Complete loss of crown | Total number of RCSC =19 |             |                                                                         |                   |           |            |                                                                         |                      |          |            |                                                                                                                                                                                                                                                                             |         |          | The results showed that restoration failure was significantly higher in RCSC group when compared to ZCs with significant level of (0.0001).                                                                                                           |  |
|                                       |                                                                                                                                              | Total number of ZC =20   |             |                                                                         |                   |           |            |                                                                         |                      |          |            |                                                                                                                                                                                                                                                                             |         |          |                                                                                                                                                                                                                                                       |  |
|                                       |                                                                                                                                              | Score                    |             | 0                                                                       |                   | 1         |            | 2                                                                       |                      | 3        |            |                                                                                                                                                                                                                                                                             |         |          |                                                                                                                                                                                                                                                       |  |
|                                       |                                                                                                                                              | RCSC<br>n (%)            |             | 5 (26.3)                                                                |                   | 11 (57.8) |            | 1 (5.2)                                                                 |                      | 2 (10.5) |            |                                                                                                                                                                                                                                                                             |         |          |                                                                                                                                                                                                                                                       |  |
|                                       |                                                                                                                                              | ZC<br>n (%)              |             | 19 (95)                                                                 |                   | 0         |            | 0                                                                       |                      | 1 (5)    |            |                                                                                                                                                                                                                                                                             |         |          |                                                                                                                                                                                                                                                       |  |
| Talekar et al. 2021 <sup>[64]</sup>   | 0= Intact or present At 12 m and 18 m<br>1= Chipped / loss of material<br>2= Complete loss of the crown.                                     |                          |             | At 12 m<br>Total number of GFRC = 33 (%)<br>Total number of NSZ= 33 (%) |                   |           |            | At 18 m<br>Total number of GFRC = 29 (%)<br>Total number of NSZ= 30 (%) |                      |          |            | The results showed a significant difference (P<0.05) between the two periods. Only two of the NSZ crowns were dislodged at 12 m period with no chipping or more additional losses later. Half of GFRC crowns were damaged and the losses were double of NSZ at 18 m period. |         |          |                                                                                                                                                                                                                                                       |  |
|                                       |                                                                                                                                              | Score                    |             | 0                                                                       |                   | 1         |            | 2                                                                       |                      | 0        |            |                                                                                                                                                                                                                                                                             | 1       |          | 2                                                                                                                                                                                                                                                     |  |
|                                       |                                                                                                                                              | GFRC<br>n (%)            |             | 23 (70)                                                                 |                   | 7 (21)    |            | 3 (9)                                                                   |                      | 15 (52)  |            |                                                                                                                                                                                                                                                                             | 13 (45) |          | 1 (3)                                                                                                                                                                                                                                                 |  |
|                                       |                                                                                                                                              | NSZ<br>n (%)             |             | 31 (94)                                                                 |                   | 0 (0)     |            | 2 (6)                                                                   |                      | 30 (100) |            |                                                                                                                                                                                                                                                                             | 0       |          | 0                                                                                                                                                                                                                                                     |  |



|                                     |                           |    |                                    |          |          |          |          |                                                                                                                                                                                                                                                                                |
|-------------------------------------|---------------------------|----|------------------------------------|----------|----------|----------|----------|--------------------------------------------------------------------------------------------------------------------------------------------------------------------------------------------------------------------------------------------------------------------------------|
| Walia et al<br>2021 <sup>[67]</sup> | Universal testing machine | NA | Total number of each group (N)= 24 |          |          |          |          | The results showed that all the es-<br>thetic tested crowns have better re-<br>tention with BioCem and FujiCEM®<br>2 with no significant difference be-<br>tween them. However, the Ketac<br>Cem Maxicap cement was signifi-<br>cantly lower and less retentive (P=<br>0.002). |
|                                     |                           |    | Cement type                        | NSZ      | CCZ      | SEC      | KKZ      |                                                                                                                                                                                                                                                                                |
|                                     |                           |    | BioCem: n (SD)                     | 112 (17) | 110 (15) | 130 (23) | 117 (22) |                                                                                                                                                                                                                                                                                |
|                                     |                           |    | FujiCEM®: n (SD)                   | 106 (14) | 129 (25) | 111 (17) | 114 (21) |                                                                                                                                                                                                                                                                                |
|                                     |                           |    | Ketac Cem<br>Maxicap: n (SD)       | 44 (10)  | 31 (10)  | 27 (12)  | 20 (9)   |                                                                                                                                                                                                                                                                                |

Abbreviation: MPa, Megapascal; OCH, Occluso-cervical heights; TC, Thermocycling; NTC, Non-thermocycling “control group”; SD, Standard deviation; SSC, Stainless steel crown; KKZ, Kinder Krown Zirconia crown; GIC, Glass ionomer cement; RCSC, Resin composite strip crown; PVSSC, Preveneerd stainless steel crown; NSZ, NuSmile Zirconia crown; EZP, EZ Pedo crown; ZZC, Zirkiz zirconia crown; GFRC, Glass fiber-reinforced composite crown-Figaro Crowns.

**Supplemental Table S5.** Summary of the included studies’ findings about the fracture resistance of zirconia crowns for primary teeth.

| Study                              | Assessment Score/Method   | Time of Evaluation   | Results                    |         |             |                 | Summary of Results                                                                                                                                                                                                                                                                                                                                                                                                                              |
|------------------------------------|---------------------------|----------------------|----------------------------|---------|-------------|-----------------|-------------------------------------------------------------------------------------------------------------------------------------------------------------------------------------------------------------------------------------------------------------------------------------------------------------------------------------------------------------------------------------------------------------------------------------------------|
| Tara et al., 2018 <sup>[30]</sup>  | 0= Intact                 | At 1, 3, 6 and 12 m. | Total number of NSZ= 15    |         |             |                 | The results showed that only one NSZ has fractured at the 12-month follow-up.                                                                                                                                                                                                                                                                                                                                                                   |
|                                    | 1= <50% surface chipped   |                      |                            | Score 0 | Score 1     | Score 2 at 12 m |                                                                                                                                                                                                                                                                                                                                                                                                                                                 |
|                                    | 2= >50% surface chipped   |                      | n (%)                      | 14 (93) | 0 (0)       | 1 (7)           |                                                                                                                                                                                                                                                                                                                                                                                                                                                 |
| Kist et al ., 2019 <sup>[42]</sup> | Universal testing machine | NA                   | Total number of crowns= 85 |         |             |                 | The results showed that among the prefabricated ZCs before aging, NZS had the highest fracture loads, followed by KKZ and SEC. After aging, results showed that KKZ scored the highest fracture loads among all prefabricated ZCs. However, the CAD/CAM crowns showed Significantly higher fracture loads than prefabricated ZCs. The PVSSC showed the highest fracture loads when compared with all types of ZCs, both with and without aging. |
|                                    |                           |                      | SEC: Mean (SD)             |         | 893 (223)   |                 |                                                                                                                                                                                                                                                                                                                                                                                                                                                 |
|                                    |                           |                      | KKZ: Mean (SD)             |         | 1570 (368)  |                 |                                                                                                                                                                                                                                                                                                                                                                                                                                                 |
|                                    |                           |                      | NSZ: Mean (SD)             |         | 1582 (638)  |                 |                                                                                                                                                                                                                                                                                                                                                                                                                                                 |
|                                    |                           |                      | CAD/CAM ZC: Mean (SD)      |         | 2444 (360)  |                 |                                                                                                                                                                                                                                                                                                                                                                                                                                                 |
|                                    |                           |                      | PVSSC: Mean (SD)           |         | 6251 (1170) |                 |                                                                                                                                                                                                                                                                                                                                                                                                                                                 |

|                                         |                                                                                                                                                                                                                                 |                                                   |                                                     |           |                   |         |   |                                                                                                                                                               |
|-----------------------------------------|---------------------------------------------------------------------------------------------------------------------------------------------------------------------------------------------------------------------------------|---------------------------------------------------|-----------------------------------------------------|-----------|-------------------|---------|---|---------------------------------------------------------------------------------------------------------------------------------------------------------------|
| Al shobber et al., 2017 <sup>[50]</sup> | Universal testing machine                                                                                                                                                                                                       | NA                                                | Total number of teeth in each group (N)=16          |           |                   |         |   | The results showed that NZS scored the highest fracture loads.                                                                                                |
|                                         |                                                                                                                                                                                                                                 |                                                   | CCP: Mean (SD)                                      |           | 415.58 (12.28)    |         |   | Whereas CCP, showed the lowest forces required for fracture of                                                                                                |
|                                         |                                                                                                                                                                                                                                 |                                                   | CCZ: Mean (SD)                                      |           | 751.43 (102.1)    |         |   | the crown. Both NSZ and CCZ showed statistically significant dif-                                                                                             |
|                                         |                                                                                                                                                                                                                                 |                                                   | NSZ: Mean (SD)                                      |           | 646.68 (229.62)   |         |   | ference in forces required to fracture the crowns when compared                                                                                               |
|                                         |                                                                                                                                                                                                                                 |                                                   | PVSSC: Mean (SD)                                    |           | 482.37 (76.94)    |         |   | to PVSSC (p<0.05).                                                                                                                                            |
| El Makawi et al., 2019 <sup>[43]</sup>  | Universal testing machine                                                                                                                                                                                                       | NA                                                | Total number of teeth in each group (N)=10          |           |                   |         |   | The results showed that NSZ scored high mean and SD values.                                                                                                   |
|                                         |                                                                                                                                                                                                                                 |                                                   | NSZ: Mean (SD)                                      |           | 1420.893 (308.39) |         |   | While LDE scored lower mean and SD with values with a statisti-                                                                                               |
|                                         |                                                                                                                                                                                                                                 |                                                   | LDE: Mean (SD)                                      |           | 854.427 (130.52)  |         |   | cally significant difference between them (p=0.0001).                                                                                                         |
| Townsend et al., 2014 <sup>[53]</sup>   | Universal testing machine                                                                                                                                                                                                       | NA                                                | Total number of teeth in each group (N)=20          |           |                   |         |   | The results showed that the forces required to fracture EZP was                                                                                               |
|                                         |                                                                                                                                                                                                                                 |                                                   | EZP: Mean (SD)                                      |           | 1091(146.5)       |         |   | significantly higher than NSZ and KKZ (P<0.001). In addition,                                                                                                 |
|                                         |                                                                                                                                                                                                                                 |                                                   | KKZ: Mean (SD)                                      |           | 576 (132.3)       |         |   | NSW required significantly higher forces to be fractured more                                                                                                 |
|                                         |                                                                                                                                                                                                                                 |                                                   | NSZ: Mean (SD)                                      |           | 691 (113.3)       |         |   | than all three ZCs (P<0.001).                                                                                                                                 |
|                                         |                                                                                                                                                                                                                                 |                                                   | PVSSC: Mean (SD)                                    |           | 1937(545.5)       |         |   |                                                                                                                                                               |
| Azab et al., <sup>[54]</sup>            | Visual inspection to detect incom-<br>plete fracture lines or complete frac-<br>tures with loss of crown material                                                                                                               | At 1 week, 1,<br>3, 6, 9, 12, 18,<br>24, and 36 m | Zero fractured crowns at all follow-up time-points. |           |                   |         |   | The results showed that there were no fractured crowns noted for<br>both types of cements.                                                                    |
| Padmanabh et al., 2021 <sup>[57]</sup>  | 0= No fracture<br>1= Cracks detected visually and manually less than 1/3 of surface<br>2= Cracks detected visually and manually from 1/3 to 1/2 of surface<br>3= Cracks detected visually and manually more than 1/2 of surface | NA                                                | Total number of teeth in each group (N)=20          |           |                   |         |   | The results showed that there were no fractures noted after sterili-<br>zation between different types of crowns in all control and experi-<br>mental groups. |
|                                         |                                                                                                                                                                                                                                 |                                                   | Score                                               | 0         | 1                 | 2       | 3 |                                                                                                                                                               |
|                                         |                                                                                                                                                                                                                                 |                                                   | PVSSC<br>n (%)                                      | 20 (100%) | 0                 | 0       | 0 |                                                                                                                                                               |
|                                         |                                                                                                                                                                                                                                 |                                                   | SSC<br>n (%)                                        | 20 (100%) | 0                 | 0       | 0 |                                                                                                                                                               |
|                                         |                                                                                                                                                                                                                                 |                                                   | ZC<br>n (%)                                         | 20 (100%) | 0                 | 0       | 0 |                                                                                                                                                               |
| Talekar et al. 2021                     | 0= intact occlusal surface                                                                                                                                                                                                      |                                                   |                                                     | At 12 m   |                   | At 18 m |   |                                                                                                                                                               |



|                                   |                          |    |   |                                                                                                                                                                                                                                                                                                                                                                                                                                                 |
|-----------------------------------|--------------------------|----|---|-------------------------------------------------------------------------------------------------------------------------------------------------------------------------------------------------------------------------------------------------------------------------------------------------------------------------------------------------------------------------------------------------------------------------------------------------|
| Mohn et al., 2021 <sup>[69]</sup> | Thermomechanical loading | NA | - | <p>The results showed that (CAD/CAM) ZC reported the lowest wear resistance among other groups. Whereas RCSC showed significantly lower wear depth compared to gold standard. However, there was no sign of wear on the surface of NSZ. On other hand, KKZ showed 119-micrometervertical wear along with microcrack signs.</p> <p>Furthermore, (CAD/CAM) ZC exhibit significantly lower antagonist wear than SSC (<math>p &lt; .05</math>).</p> |
|-----------------------------------|--------------------------|----|---|-------------------------------------------------------------------------------------------------------------------------------------------------------------------------------------------------------------------------------------------------------------------------------------------------------------------------------------------------------------------------------------------------------------------------------------------------|

Abbreviation: EYP, EZ Pedo crown; KKZ, Kinder Krown Zirconia crown; NSZ, NuSmile Zirconia crown; NSW, Nusmile Signature crown; ZC, Zirconia crown; NA, Not applicable; SEC, Spring EZ crown; CAD/CAM, Computer-aided manufacturing/Computer-aided modeling; CCZC, CAD/CAM zirconia crown; PVSSC, Preveenerd stainless steel crown; SD, Standard deviation; CCZ, Cheng crown zirconia; CCP, Cheng crown preveenerd; LDE, Lithium disilicate endocrown; SSC, Stainless steel crown; GFRC, Glass fiber-reinforced composite crown - Figaro Crowns; NCCE, Nano-Ceramic Compo-site Endo-crowns.

**Supplemental Table S6.** Summary of the included studies' findings about the marginal integrity of zirconia crowns for primary teeth.

| Study                       | Assessment Method                                                                                                                 | Time of Evaluation                       | Results                                      |             |               | Summary of Results                                                                                                                                                                                                                  |
|-----------------------------|-----------------------------------------------------------------------------------------------------------------------------------|------------------------------------------|----------------------------------------------|-------------|---------------|-------------------------------------------------------------------------------------------------------------------------------------------------------------------------------------------------------------------------------------|
| Holsinger et al., 2016 [44] | Visible inspection and tactile examination with an explorer<br><br>0= Closed margin<br>1= Open margin                             | (Retrospective study)<br><br>2010 – 2014 | Total number of EZP (N) =44                  |             |               | The results showed that majority of EZP (86%) had closed margins, and few (14%) had open margins.                                                                                                                                   |
|                             |                                                                                                                                   |                                          | Score                                        | 0           | 1             |                                                                                                                                                                                                                                     |
|                             |                                                                                                                                   |                                          | EZP n(%)                                     | 38 (86)     | 6 (14)        |                                                                                                                                                                                                                                     |
| AlHaj et al., 2019 [52]     | Thirteen measurements were made at 13 different sites on the digital photographs of the sectioned surfaces of the specimens using | NA                                       | Total number of teeth in each group (N) = 15 |             |               | The results showed that NSZ cemented with resin cement had significantly lower internal gap width mean than PVSSCs and SSCs cemented with resin cement (P<0.001). In addition, the difference between NSZ, PVSSC and SSC and luting |
|                             |                                                                                                                                   |                                          | Mean (SD)                                    |             |               |                                                                                                                                                                                                                                     |
|                             |                                                                                                                                   |                                          | Gap                                          | Crown type  | Luting cement |                                                                                                                                                                                                                                     |
|                             |                                                                                                                                   |                                          |                                              | SSC         | GIC           |                                                                                                                                                                                                                                     |
|                             |                                                                                                                                   |                                          | Marginal                                     | 0.35 (0.17) | 0.38 (0.16)   |                                                                                                                                                                                                                                     |
| Internal                    | 0.34 (0.12)                                                                                                                       | 0.37 (0.09)                              |                                              |             |               |                                                                                                                                                                                                                                     |

|                                                    |                                                                                                                                                                                              |                    |                                              |            |          |             |             |    |              |             |               |                                                                                    |                                                                                                                                                                                                                                                                 |
|----------------------------------------------------|----------------------------------------------------------------------------------------------------------------------------------------------------------------------------------------------|--------------------|----------------------------------------------|------------|----------|-------------|-------------|----|--------------|-------------|---------------|------------------------------------------------------------------------------------|-----------------------------------------------------------------------------------------------------------------------------------------------------------------------------------------------------------------------------------------------------------------|
| a modified method to that adopted by Korkut et al. |                                                                                                                                                                                              |                    |                                              |            |          | PVSSCs      |             |    | RMGIC        |             |               | cement used, was not significant regarding the width of the marginal gap (P>0.05). |                                                                                                                                                                                                                                                                 |
|                                                    |                                                                                                                                                                                              |                    | Marginal                                     |            |          | 0.34 (0.22) |             |    | 0.26 (0.18)  |             |               |                                                                                    |                                                                                                                                                                                                                                                                 |
|                                                    |                                                                                                                                                                                              |                    | Internal                                     |            |          | 0.38 (0.12) |             |    | 0.26 (0.11)  |             |               |                                                                                    |                                                                                                                                                                                                                                                                 |
|                                                    |                                                                                                                                                                                              |                    |                                              |            |          | NSZ         |             |    | Resin Cement |             |               |                                                                                    |                                                                                                                                                                                                                                                                 |
|                                                    |                                                                                                                                                                                              |                    | Marginal                                     |            |          | 0.17 (0.09) |             |    | 0.24 (0.20)  |             |               |                                                                                    |                                                                                                                                                                                                                                                                 |
|                                                    |                                                                                                                                                                                              |                    | Internal                                     |            |          | 0.19 (0.12) |             |    | 0.29 (0.20)  |             |               |                                                                                    |                                                                                                                                                                                                                                                                 |
| Donly et al., 2018 <sup>[55]</sup>                 | A= Clinically ideal, with no ditching or gap<br>B= Clinically acceptable, with evidence of ditching or gap<br>C= Clinically unacceptable, with mobility, making crown replacement necessary. | At 6, 12, and 24 m | Total number of teeth in each group (N)      | 6m<br>N=44 |          |             | 12m<br>N=43 |    |              | 24m<br>N=39 |               |                                                                                    | The results showed that the majority NSZ scored A except 13 crowns scored B, 4 of them at 6 months follow-up, 6 of them at 12 month and only 3 at 24 months. Whereas in SCC, almost all crowns scored A and only 1 scored B, at 6, 12- and 24-months follow-up. |
|                                                    |                                                                                                                                                                                              |                    |                                              |            |          |             |             |    |              |             |               |                                                                                    |                                                                                                                                                                                                                                                                 |
|                                                    |                                                                                                                                                                                              |                    |                                              |            |          |             |             |    |              |             |               |                                                                                    |                                                                                                                                                                                                                                                                 |
|                                                    |                                                                                                                                                                                              |                    |                                              |            |          |             |             |    |              |             |               |                                                                                    |                                                                                                                                                                                                                                                                 |
|                                                    |                                                                                                                                                                                              |                    |                                              |            |          |             |             |    |              |             |               |                                                                                    |                                                                                                                                                                                                                                                                 |
| Alaki et al., 2020 <sup>[58]</sup>                 | 0= Close marginal adaptation<br>1= No detectable margin<br>2= Detectable margin                                                                                                              | At 3, 6 and 12 m   | -                                            |            |          |             |             |    |              |             |               |                                                                                    | The results showed that 11.7% of the RCSC group had small but noticeable area of material marginal loss.                                                                                                                                                        |
|                                                    |                                                                                                                                                                                              |                    |                                              |            |          |             |             |    |              |             |               |                                                                                    |                                                                                                                                                                                                                                                                 |
|                                                    |                                                                                                                                                                                              |                    |                                              |            |          |             |             |    |              |             |               |                                                                                    |                                                                                                                                                                                                                                                                 |
|                                                    |                                                                                                                                                                                              |                    |                                              |            |          |             |             |    |              |             |               |                                                                                    |                                                                                                                                                                                                                                                                 |
| Gill et al., 2020 <sup>[38]</sup>                  | 0= No discrepancies detected with explorer<br>1= Detectable discrepancies but clinically acceptable<br>2= Detectable discrepancies, replacement required                                     | At 12 m            | Total number of teeth (N) = 135              |            |          |             |             |    |              |             |               |                                                                                    | The results showed that NSZ had the second highest rate (93%) when measuring the marginal adaptation.                                                                                                                                                           |
|                                                    |                                                                                                                                                                                              |                    | Score                                        |            | 0        |             | 1           |    | 2            |             | Missing n (%) |                                                                                    |                                                                                                                                                                                                                                                                 |
|                                                    |                                                                                                                                                                                              |                    | RCSC n (%)                                   |            | 33 (69)  |             | 11 (23)     |    | 3 (6)        |             | 1 (2)         |                                                                                    |                                                                                                                                                                                                                                                                 |
|                                                    |                                                                                                                                                                                              |                    | PVSSC n (%)                                  |            | 46 (98)  |             | 1 (2)       |    | 0 (0)        |             | 0 (0)         |                                                                                    |                                                                                                                                                                                                                                                                 |
|                                                    |                                                                                                                                                                                              |                    | NSZ n (%)                                    |            | 37 (93)  |             | 2 (5)       |    | 0 (0)        |             | 1 (3)         |                                                                                    |                                                                                                                                                                                                                                                                 |
|                                                    |                                                                                                                                                                                              |                    | Total n (%)                                  |            | 116 (86) |             | 14 (10)     |    | 3 (2)        |             | 2 (2)         |                                                                                    |                                                                                                                                                                                                                                                                 |
| Nischal et al., 2020 <sup>[60]</sup>               | Alpha criteria rating system.                                                                                                                                                                | At 3, 6 and 9 m    | Total number of teeth in each group (N) = 15 |            |          |             |             |    |              |             |               |                                                                                    |                                                                                                                                                                                                                                                                 |
|                                                    |                                                                                                                                                                                              |                    |                                              | 3m         |          | 6m          |             | 9m |              |             |               |                                                                                    |                                                                                                                                                                                                                                                                 |

|                                      |                                                                                                                      |                                          |                              |             |            |   |   |             |        |   |         |             |           |          |           |                                                                                                                                                                                                  |
|--------------------------------------|----------------------------------------------------------------------------------------------------------------------|------------------------------------------|------------------------------|-------------|------------|---|---|-------------|--------|---|---------|-------------|-----------|----------|-----------|--------------------------------------------------------------------------------------------------------------------------------------------------------------------------------------------------|
|                                      |                                                                                                                      |                                          | Score                        | A           | B          | C | D | A           | B      | C | D       | A           | B         | C        | D         | The results showed that ZCs had no change in the marginal integrity after 9 months of recall.                                                                                                    |
|                                      |                                                                                                                      |                                          | RCSC<br>n (%)                | 15<br>(100) | 0          | 0 | 0 | 12 (80)     | 3 (20) | 0 | 0       | 9 (60)      | 3<br>(20) | 1<br>(7) | 2<br>(13) |                                                                                                                                                                                                  |
|                                      |                                                                                                                      |                                          | ZC<br>n (%)                  | 15<br>(100) | 0          | 0 | 0 | 15<br>(100) | 0      | 0 | 0       | 15<br>(100) | 0         | 0        | 0         |                                                                                                                                                                                                  |
|                                      |                                                                                                                      |                                          | Luxa<br>Crown<br>n (%)       | 15<br>(100) | 0          | 0 | 0 | 15<br>(100) | 0      | 0 | 0       | 11<br>(87)  | 1<br>(7)  | 1<br>(7) | 2<br>(13) |                                                                                                                                                                                                  |
| Yanover et al., 2020 <sup>[63]</sup> | 0= Continuous with the contour of the crown<br>1= Slight overhang or under-contour present<br>2= Large defects noted | At 6-10.4m,<br>12.5-17.9m,<br>18.4-33.8m | Total Number of ZC (N) =1 31 |             |            |   |   |             |        |   |         |             |           |          |           | The results showed that the majority of the ZCs were nicely adapted 82.4% with only 13.7% of the crowns were slight over-hanged or under-contoured and 3.9% were found with large defects.       |
|                                      |                                                                                                                      |                                          | Score                        |             | 0          |   |   | 1           |        |   | 2       |             |           |          |           |                                                                                                                                                                                                  |
|                                      |                                                                                                                      |                                          | n (%)                        |             | 107 (82.4) |   |   | 18 (13.7)   |        |   | 6 (3.9) |             |           |          |           |                                                                                                                                                                                                  |
| Möhn et al., 2021 <sup>[69]</sup>    | Thermomechanical loading                                                                                             | N/A                                      | -                            |             |            |   |   |             |        |   |         |             |           |          |           | The results showed that (CAD/CAM) ZC reported a significantly higher marginal adaptation compared to other crowns. Whereas ZC cemented with GI cement revealed lowest continuity in the margins. |

Abbreviation: EZP, EZ Pedo crown; NA, Not applicable; SD, Standard deviation; SSC, Stainless steel crown; PVSSC, Preveenerd stainless steel crown; GIC, Glass ionomer cement; RMGIC, Resin modified glass ionomer cement; NSZ, NuSmile Zirconia crown; RCSC, Resin composite strip crown; ZC, Zirconia crown.

**Supplemental Table S7.** Summary of the included studies' findings about the surface roughness of zirconia crowns for primary teeth.

| Study                                | Assessment Method                                         | Results                                      |                                 |                                  |                                             |                                              | Summary of Results                                                                                                                                                                                                                                                                                          |
|--------------------------------------|-----------------------------------------------------------|----------------------------------------------|---------------------------------|----------------------------------|---------------------------------------------|----------------------------------------------|-------------------------------------------------------------------------------------------------------------------------------------------------------------------------------------------------------------------------------------------------------------------------------------------------------------|
| Walia et al., 2019 <sup>[41]</sup>   | Using a mechanical surface roughness tester/ profilometer | Total number of teeth in each group (N) = 10 |                                 |                                  |                                             |                                              | The results showed that there were significantly different surface roughness and roughness depth scores for KKZ first and second molar when compared to CCZ, SEC and NSZ for occlusal surfaces (p=0.013). A similar result was observed for occlusal edges for first and second primary molars (p = 0.013). |
|                                      |                                                           | Surface roughness Mean (SD)                  |                                 |                                  |                                             |                                              |                                                                                                                                                                                                                                                                                                             |
|                                      |                                                           | Crown type                                   | Occlusal surface<br>First molar | Occlusal surface<br>Second molar | Occlusal edge (buccal cusps)<br>First molar | Occlusal edge (buccal cusps)<br>Second molar |                                                                                                                                                                                                                                                                                                             |
|                                      |                                                           | CCZ                                          | 0.34 (0.07)                     | 0.36 (0.04)                      | 0.30 (0.04)                                 | 0.28 (0.02)                                  |                                                                                                                                                                                                                                                                                                             |
|                                      |                                                           | SEC                                          | 0.39 (0.09)                     | 0.45 (0.07)                      | 0.41 (0.08)                                 | 0.36 (0.03)                                  |                                                                                                                                                                                                                                                                                                             |
|                                      |                                                           | NSZ                                          | 0.37 (0.06)                     | 0.40 (0.06)                      | 0.40 (0.06)                                 | 0.35 (0.05)                                  |                                                                                                                                                                                                                                                                                                             |
|                                      |                                                           | KKZ                                          | 0.70 (0.03)                     | 0.91 (0.09)                      | 1.04 (0.26)                                 | 0.60 (0.12)                                  |                                                                                                                                                                                                                                                                                                             |
|                                      |                                                           | Roughness depth Mean (SD)                    |                                 |                                  |                                             |                                              |                                                                                                                                                                                                                                                                                                             |
|                                      |                                                           |                                              | Occlusal surface<br>First molar | Occlusal surface<br>Second molar | Occlusal edge (buccal cusps)<br>First molar | Occlusal edge (buccal cusps)<br>Second molar |                                                                                                                                                                                                                                                                                                             |
|                                      |                                                           | CCZ                                          | 1.10 (0.08)                     | 0.86 (0.12)                      | 1.03 (0.09)                                 | 1.03 (0.09)                                  |                                                                                                                                                                                                                                                                                                             |
|                                      |                                                           | SEC                                          | 1.20 (0.28)                     | 1.30 (0.63)                      | 1.30 (0.16)                                 | 1.56 (0.44)                                  |                                                                                                                                                                                                                                                                                                             |
|                                      |                                                           | NSZ                                          | 1.53 (0.16)                     | 0.90 (0.08)                      | 1.10 (0.01)                                 | 1.16 (0.12)                                  |                                                                                                                                                                                                                                                                                                             |
|                                      |                                                           | KKZ                                          | 2.23 (0.28)                     | 2.23 (0.28)                      | 3.5 (0.99)                                  | 2.66 (0.36)                                  |                                                                                                                                                                                                                                                                                                             |
| Theriot et al., 2017 <sup>[51]</sup> | Using a mechanical surface roughness tester/ profilometer | Total number of teeth in each group (N) = 20 |                                 |                                  |                                             |                                              | The results showed that the lingual surfaces of NSZ had a statistically significant lower mean of surface roughness than the lingual surfaces of SEC and KKZ (P<0.001).                                                                                                                                     |
|                                      |                                                           | Surface roughness Mean (SD)                  |                                 |                                  |                                             |                                              |                                                                                                                                                                                                                                                                                                             |
|                                      |                                                           |                                              | Labial crown surface            |                                  | Lingual crown surface                       |                                              |                                                                                                                                                                                                                                                                                                             |
|                                      |                                                           | NSZ                                          | 2.8 (0.3)                       |                                  | 1.9 (0.5)                                   |                                              |                                                                                                                                                                                                                                                                                                             |

|                                      |                                                                                                                                               |                                              |             |    |            |             |             |           |             |    |                                                                                                                                                                       |                                                                                                                                                                                                                                                                                                                                                                    |                                                                                          |   |   |
|--------------------------------------|-----------------------------------------------------------------------------------------------------------------------------------------------|----------------------------------------------|-------------|----|------------|-------------|-------------|-----------|-------------|----|-----------------------------------------------------------------------------------------------------------------------------------------------------------------------|--------------------------------------------------------------------------------------------------------------------------------------------------------------------------------------------------------------------------------------------------------------------------------------------------------------------------------------------------------------------|------------------------------------------------------------------------------------------|---|---|
|                                      |                                                                                                                                               | SEC                                          |             |    | 2.5 (0.51) |             |             | 3.7 (0.8) |             |    | Whereas in the labial surfaces of KKZ, results showed a statistically significant higher mean of surface roughness than the labial surfaces of NSZ and SEC (P<0.001). |                                                                                                                                                                                                                                                                                                                                                                    |                                                                                          |   |   |
|                                      |                                                                                                                                               | KKZ                                          |             |    | 4.3 (0.61) |             |             | 3.2 (0.6) |             |    |                                                                                                                                                                       |                                                                                                                                                                                                                                                                                                                                                                    |                                                                                          |   |   |
| Donly et al., 2018 <sup>[55]</sup>   | A= Ideal, with a smooth crown surface<br>B= Clinically acceptable, with a slightly rough<br>C= Clinically unacceptable, with a crown fracture | Total number of teeth in each group (N)      | 6m<br>N=43  |    |            | 12m<br>N=43 |             |           | 24m<br>N=39 |    |                                                                                                                                                                       | The results showed that NSZ has scored A (clinically ideal) in all time points 6, 12 and 24 months except two crowns scored B, one crown after 6 months and the other after 24 months with no crown scored C. Whereas in SSC, all crowns scored A at all evaluation time-points. There were no statistically significant differences between both crowns (P<0.05). |                                                                                          |   |   |
|                                      |                                                                                                                                               |                                              | Score       | A  | B          | C           | A           | B         | C           | A  | B                                                                                                                                                                     |                                                                                                                                                                                                                                                                                                                                                                    | C                                                                                        |   |   |
|                                      |                                                                                                                                               |                                              | NSZ (n)     | 42 | 1          | 0           | 43          | 0         | 0           | 35 | 1                                                                                                                                                                     |                                                                                                                                                                                                                                                                                                                                                                    | 0                                                                                        |   |   |
|                                      |                                                                                                                                               |                                              | SSC (n)     | 43 | 0          | 0           | 42          | 0         | 0           | 34 | 0                                                                                                                                                                     |                                                                                                                                                                                                                                                                                                                                                                    | 0                                                                                        |   |   |
| Nischal et al., 2020 <sup>[60]</sup> | The Modified United States Public Health Service (USPHS) criteria                                                                             | Total number of teeth in each group (N) = 15 |             |    |            |             |             |           |             |    |                                                                                                                                                                       |                                                                                                                                                                                                                                                                                                                                                                    | The results showed that at 9-month follow up, the surface texture of ZCs did not change. |   |   |
|                                      |                                                                                                                                               |                                              | 3m          |    |            |             | 6m          |           |             |    | 9m                                                                                                                                                                    |                                                                                                                                                                                                                                                                                                                                                                    |                                                                                          |   |   |
|                                      |                                                                                                                                               | Score                                        | A           | B  | C          | D           | A           | B         | C           | D  | A                                                                                                                                                                     | B                                                                                                                                                                                                                                                                                                                                                                  |                                                                                          | C | D |
|                                      |                                                                                                                                               | RCSC n (%)                                   | 15<br>(100) | 0  | 0          | 0           | 15<br>(100) | 0         | 0           | 0  | 12<br>(80)                                                                                                                                                            | 3<br>(20)                                                                                                                                                                                                                                                                                                                                                          |                                                                                          | 0 | 0 |
|                                      |                                                                                                                                               | ZC n (%)                                     | 15<br>(100) | 0  | 0          | 0           | 15<br>(100) | 0         | 0           | 0  | 15<br>(100)                                                                                                                                                           | 0                                                                                                                                                                                                                                                                                                                                                                  |                                                                                          | 0 | 0 |
|                                      |                                                                                                                                               | Luxa Crown n (%)                             | 15<br>(100) | 0  | 0          | 0           | 15<br>(100) | 0         | 0           | 0  | 13<br>(87)                                                                                                                                                            | 2<br>(13)                                                                                                                                                                                                                                                                                                                                                          |                                                                                          | 0 | 0 |

Abbreviation: SD, Standard deviation; CCZ, Cheng crown zirconia; SEC, Spring EZ crown; SSC, Stainless steel crown; NSZ, NuSmile Zirconia crown; KKZ, Kinder Krown Zirconia crown; RCSC, Resin composite strip crown; ZC, Zirconia crown.



**Supplemental Table S8.** Summary of the included studies' findings about recurrent caries with zirconia crowns for primary teeth.

| Study                                  | Assessment Score                   | Time of Evaluation                   | Results                                      |             |          |              |         |              |          | Summary of Results                                                                                                                                                                                                                  |  |
|----------------------------------------|------------------------------------|--------------------------------------|----------------------------------------------|-------------|----------|--------------|---------|--------------|----------|-------------------------------------------------------------------------------------------------------------------------------------------------------------------------------------------------------------------------------------|--|
| Holsinger et al., 2016 <sup>[44]</sup> | 0= No caries<br>1=Recurrent caries | (Retrospective study)<br>2010 – 2014 | Total number of EZP (N) = 44                 |             |          |              |         |              |          | The results showed that EZP did not report recurrent caries.                                                                                                                                                                        |  |
|                                        |                                    |                                      |                                              |             | Score 0  |              | Score 1 |              |          |                                                                                                                                                                                                                                     |  |
|                                        |                                    |                                      | n (%)                                        |             | 44 (100) |              | 0 (0)   |              |          |                                                                                                                                                                                                                                     |  |
| Donly et al., 2018 <sup>[55]</sup>     | 0= No caries<br>1=Recurrent caries | At 6,12 and 24 m                     | Total number of teeth in each group (N)      | 6 m<br>N=43 |          | 12 m<br>N=43 |         | 24 m<br>N=39 |          | The results indicated that both NSZ and SSC showed no recurrent caries.                                                                                                                                                             |  |
|                                        |                                    |                                      | Score                                        | 0           | 1        | 0            | 1       | 0            | 1        |                                                                                                                                                                                                                                     |  |
|                                        |                                    |                                      | NSZ: n                                       | 43          | 0        | 43           | 0       | 36           | 0        |                                                                                                                                                                                                                                     |  |
|                                        |                                    |                                      | SSC: n                                       | 43          | 0        | 42           | 0       | 34           | 0        |                                                                                                                                                                                                                                     |  |
|                                        |                                    |                                      |                                              |             |          |              |         |              |          |                                                                                                                                                                                                                                     |  |
| Alaki et al., 2020 <sup>[58]</sup>     | 0= No caries<br>1= Caries          | At 3, 6 and 12 m                     | Total number of teeth in each group (N) = 60 |             |          |              |         |              |          | The results showed that none of the teeth covered with ZC had developed recurrent caries. While for RCSC group, at 12 months follow up, 6.7% had presented with recurrent caries, but this finding was not significant (p < 0.135). |  |
|                                        |                                    |                                      |                                              | 3m          |          | 6m           |         | 12m          |          |                                                                                                                                                                                                                                     |  |
|                                        |                                    |                                      | Score                                        | 0           | 1        | 0            | 1       | 0            | 1        |                                                                                                                                                                                                                                     |  |
|                                        |                                    |                                      | ZC n (%)                                     | 60 (100)    | 0        | 59 (100)     | 0       | 58 (100)     | 0        |                                                                                                                                                                                                                                     |  |
|                                        |                                    |                                      | RCSC n (%)                                   | 60 (100)    | 0        | 60 (100)     | 0       | 56 (93.3)    | 4 (6.7)  |                                                                                                                                                                                                                                     |  |
| Nischal et al., 2020 <sup>[60]</sup>   | 0= No caries<br>1=Recurrent caries | At 3, 6 and 9 m                      | Total number of teeth in each group (N) = 15 |             |          |              |         |              |          | The results showed that ZCs did not develop secondary caries. When all groups were compared, there was a statistically significant difference (p value = 0.012).                                                                    |  |
|                                        |                                    |                                      |                                              | 3m          |          | 6m           |         | 9m           |          |                                                                                                                                                                                                                                     |  |
|                                        |                                    |                                      | Score                                        | 0           | 1        | 0            | 1       | 0            | 1        |                                                                                                                                                                                                                                     |  |
|                                        |                                    |                                      | RCSC n (%)                                   | 15 (100)    | 0        | 15 (100)     | 0       | 11 (73.4)    | 4 (26.6) |                                                                                                                                                                                                                                     |  |
|                                        |                                    |                                      | ZC n (%)                                     | 15 (100)    | 0        | 15 (100)     | 0       | 15 (100)     | 0        |                                                                                                                                                                                                                                     |  |

|  |                         |          |   |          |   |          |   |  |
|--|-------------------------|----------|---|----------|---|----------|---|--|
|  | <b>Luxa Crown n (%)</b> | 15 (100) | 0 | 15 (100) | 0 | 15 (100) | 0 |  |
|--|-------------------------|----------|---|----------|---|----------|---|--|

Abbreviation: EZP, EZ Pedo crown; NSZ, NuSmile Zirconia crown; SSC, Stainless steel crown; ZC, Zirconia crown; RCSC, Resin composite strip crown; DCR, Direct resin composite restoration.

**Supplemental Table S9.** Summary of the included studies' findings about the crown contour of zirconia crowns for primary teeth.

| Study                                  | Assessment Method                                            | Time of Evaluation    | Results                             |          |          |          | Summary of Results                                                                                                                                                               |
|----------------------------------------|--------------------------------------------------------------|-----------------------|-------------------------------------|----------|----------|----------|----------------------------------------------------------------------------------------------------------------------------------------------------------------------------------|
| Holsinger et al., 2016 <sup>[44]</sup> | 0= Crown is cosmetic, natural looking.                       | (Retrospective study) | <b>Total number of EZP (N) = 44</b> |          |          |          | The results showed that the majority of the EZP (89%) were cosmetic and natural-looking whereas fewer were acceptable (9%) and not esthetic (2%).                                |
|                                        | 1= Size/shape is acceptable, not ideal                       | 2010–2014             |                                     | <b>0</b> | <b>1</b> | <b>2</b> |                                                                                                                                                                                  |
|                                        | 2= Crown not esthetic, detracts from appearance of the mouth |                       | <b>n (%)</b>                        | 39 (89%) | 4 (9%)   | 1 (2%)   |                                                                                                                                                                                  |
| Yanover et al., 2020 <sup>[63]</sup>   | 0= Cosmetic                                                  | At 6-10.4m            | <b>Total number of ZC (N) = 131</b> |          |          |          | According to the crown contour, the teeth rated as cosmetic were 55% (72 teeth), while 35% (47 teeth) appeared acceptable, and 9% (12 teeth) considered as not aesthetic crowns. |
|                                        | 1= Acceptable                                                | 12.5-17.9m            |                                     | <b>0</b> | <b>1</b> | <b>2</b> |                                                                                                                                                                                  |
|                                        | 2= No aesthetic                                              | 18.4-33.8m            | <b>n (%)</b>                        | 72 (55)  | 47 (35)  | 12 (9)   |                                                                                                                                                                                  |

Abbreviation: EZP, EZ Pedo crown.
